# Supplementary material
Source: Research Square preprint supplement (doi:10.21203/rs.3.rs-8880973/v1)
Supplement: Supplementary file 1 [file 5a289122a8713869b0e80c4b.xlsx]

## Sheet: S1
Supplementary Table 1 | Major and trace element content of bedrock samples.
Sample No.	Area	SiO2	TiO2	Al2O3	TFe2O3	MnO	MgO	CaO	Na2O	K2O	P2O5	LOI	Ti	Al	Fe	Mn	Mg	Ca	Na	K	P	La	Ce	Pr	Nd	Sm	Eu	Gd	Tb	Dy	Ho	Er	Tm	Yb	Lu	Y	Ag	As	Be	Bi	Cd	Co	Cr	Cu	Ga	Ge	In	Li	Mo
		%											ppm
008-2	Shitouping												0.033	6.88	1.21	342	0.02	0.45	2.65	3.88	40	48.9	128	16.8	60.7	17.75	0.11	20.2	3.86	27.1	5.75	19	3.47	23.9	3.81	206	<0.01	1.7	7.98	0.04	<0.02	0.2	23	0.5	37.4	0.21	0.046	439	2.26
036-1													0.026	6.39	0.8	182	0.02	0.39	2.49	3.64	20	43.6	106.5	15.35	57.9	18.2	0.12	21.7	4.05	26.5	5.2	15.6	2.5	16.25	2.46	184.5	0.01	1	13.55	0.06	<0.02	0.2	15	0.4	32.1	0.14	0.062	244	1.49
042-1													0.035	6.54	0.84	155	0.01	0.49	2.46	4.39	30	55.9	112.5	17.5	65.3	18.4	0.21	21.3	4.01	25.9	5.53	16.15	2.53	14.5	2.23	213	0.1	0.3	6.76	0.27	<0.02	0.1	10	7.7	30.9	0.23	0.066	128	1.24
042-2													0.023	6.34	0.84	243	0.01	0.39	2.77	3.65	10	36.4	90.7	11.9	43.9	13.1	0.09	14.75	2.99	19.9	4.34	13.85	2.52	16.6	2.59	140.5	<0.01	0.2	25.2	0.04	<0.02	0.2	8	0.3	35.6	0.17	0.073	298	0.78
060-3													0.027	6.58	0.97	279	0.01	0.41	2.86	3.68	10	42	108	13.9	49.9	14.4	0.09	16.85	3.26	22.6	4.86	15.3	2.64	18.05	2.79	170	<0.01	0.3	8.62	0.2	<0.02	0.2	28	1.3	35.9	0.21	0.088	301	7.2
067-1													0.024	6.44	1.02	297	0.01	0.38	2.63	3.86	10	36.2	93.2	12.2	44.7	13.15	0.08	14.9	2.98	21.1	4.6	14.8	2.56	17.7	2.64	157.5	<0.01	0.8	8.48	0.03	<0.02	0.2	25	0.6	34.6	0.18	0.058	306	2.7
067-2													0.026	6.5	1.01	279	0.01	0.41	2.76	3.72	10	38.5	99.7	12.95	47.9	13.9	0.09	15.9	2.97	20.7	4.33	14.05	2.45	16.85	2.63	157	<0.01	1.1	19.45	0.05	<0.02	0.2	26	1.1	34.9	0.12	0.087	292	2.54
067-3													0.025	6.73	1.07	277	0.01	0.41	2.86	3.83	10	40.6	103.5	12.75	47.5	14.85	0.1	15.1	3.14	21.5	4.66	15.15	2.57	17.5	2.69	152	<0.01	0.9	86.9	0.09	<0.02	0.2	25	0.5	37.4	0.14	0.078	302	2.24
069-2													0.038	6.17	1.11	198	0.02	0.53	2.36	3.96	20	49.9	115.5	14.7	57.3	16.9	0.21	19.8	3.76	25.7	5.62	17.65	2.89	18.4	2.62	201	<0.01	1.1	6.67	0.13	<0.02	0.2	14	0.4	30.7	0.21	0.066	81.3	1.95
077-2													0.026	6.61	0.96	286	0.01	0.39	2.79	3.78	10	46.6	113	14	54.7	17.5	0.11	19.15	3.91	26.3	5.55	17.4	2.87	19.5	2.97	184.5	<0.01	0.8	8.42	0.03	<0.02	0.2	26	1.7	36.7	0.17	0.053	275	2.47
077-3													0.025	6.59	0.97	271	0.01	0.39	2.57	3.94	10	38.1	96.5	12.85	47.9	14.7	0.1	19.15	3.75	26.1	5.5	17.05	2.84	18.7	2.89	202	<0.01	1.1	6.23	0.01	<0.02	0.1	20	2.1	33.2	0.11	0.061	293	1.88
087-1													0.026	6.38	0.93	281	0.01	0.39	2.72	3.87	10	41.6	100.5	13.25	52	16.3	0.11	19.75	3.99	26.6	5.5	16.7	2.94	19.5	2.89	178.5	<0.01	0.5	7.76	0.03	<0.02	0.2	12	1.4	36.3	0.22	0.057	279	1.17
087-3													0.025	6.58	0.93	280	0.01	0.43	2.68	4.06	10	40.1	98.3	13.25	50.8	15.7	0.11	17.95	3.59	23.9	5.08	15.6	2.76	18.65	2.7	166	<0.01	<0.2	5.86	0.06	<0.02	0.1	12	1.5	36.8	0.18	0.052	299	1.18
097-1													0.024	6.13	0.95	261	0.03	0.49	2	3.46	10	33.5	83.5	11.45	42.4	12.6	0.08	15.75	3.06	21.9	5.06	16.8	3	20.4	3.15	187	<0.01	1.2	20.2	0.02	<0.02	0.1	9	0.7	31.5	0.12	0.052	359	8.1
097-2													0.023	6.25	0.83	254	0.02	0.41	2.69	3.6	10	37.1	87.5	11.65	44.9	13.6	0.1	14.5	2.82	19.45	4.24	13.85	2.62	17.5	2.62	145	0.01	0.6	10.55	0.03	<0.02	0.1	9	0.8	35.5	0.14	0.054	265	14.05
108-1													0.029	6.54	1.08	243	0.01	0.5	2.05	3.79	10	44.7	98.8	15.2	57.3	17.45	0.12	20.7	4.02	28.6	6.23	20.6	3.52	23.7	3.66	241	<0.01	0.9	7.84	0.13	<0.02	0.3	19	0.3	33.3	0.19	0.046	249	2.26
108-3													0.027	6.59	1.13	238	0.01	0.48	2.47	3.96	10	42.5	101	14.65	55.1	16.8	0.13	20.5	3.91	27.6	5.8	18.25	3.16	21	3.28	210	0.04	0.6	7.72	0.08	<0.02	0.2	22	0.5	33.4	0.18	0.036	227	2.14
128-1													0.026	6.64	0.95	265	0.01	0.41	2.65	3.82	10	38.9	100	12.5	49.9	15.7	0.05	15.25	3.13	21.2	4.5	14.45	2.45	16.9	2.61	161.5	<0.01	5.5	10.4	0.09	<0.02	0.2	24	0.7	37.9	0.13	0.049	367	3.39
Average													0.0271111	6.49333	0.977778	257.278	0.0133333	0.430556	2.58111	3.82722	13.8889	41.95	102.039	13.7139	51.6722	15.6111	0.111667	17.9556	3.51111	24.0361	5.13056	16.2361	2.79389	18.6444	2.84611	180.944	0.04	1.09412	14.9217	0.0772222		0.177778	18.1667	1.25	34.6722	0.169444	0.0602222	278.017	3.28
24DB-3	Dabu	76.15	0.03	12.52	0.96	0.08	0.06	0.37	3.39	4.62	<0.01	0.87	0.021	6.49	0.66	672	0.03	0.29	2.52	3.87	10	7.5	19.4	2.83	11.6	4.98	0.09	7.32	1.55	11.7	2.77	9.22	1.66	11.8	1.93	94.8	0.11	1.9	8.18	8.9	0.15	0.2	9	5.5	19.8	0.05	0.081	27.9	2.78
24DB-4		76.63	0.03	12.8	0.94	0.11	0.07	0.41	3.35	4.7	<0.01	0.85	0.018	6.54	0.65	832	0.04	0.31	2.48	3.94	20	9.9	26	3.77	15.9	6.7	0.08	9.97	2.09	15.75	3.84	13.1	2.39	17.8	2.83	131.5	<0.01	1.3	8.4	0.32	0.14	0.2	8	1.2	19.6	0.05	0.052	22.1	1.38
24DB-8		76.64	0.04	12.3	1.06	0.07	0.07	0.51	3.53	4.45	<0.01	0.84	0.021	6.31	0.72	583	0.04	0.38	2.56	3.66	10	8	21.1	3.23	14.9	7.1	0.11	10.9	2.24	15.7	3.35	10	1.62	11	1.66	112	0.08	4.7	10.45	716	0.15	0.3	8	20.2	19.4	0.06	0.093	32.1	3.62
24DB-12		78.76	0.05	11.5	0.93	0.04	0.05	0.28	3.22	4.48	<0.01	0.45	0.028	5.9	0.63	363	0.03	0.21	2.33	3.65	20	6.5	15	2.14	8.9	3.77	0.13	5.51	1.09	7.72	1.76	5.46	0.92	6.11	0.95	60.9	<0.01	1.4	5.33	1.42	0.06	0.3	8	0.9	16.8	<0.05	0.044	71.2	0.78
24DB-13		76.98	0.06	12.76	1.07	0.07	0.08	0.36	3.83	4.45	0.01	0.49	0.036	6.47	0.72	571	0.04	0.27	2.75	3.61	40	10	23.5	3.37	14.2	6.03	0.18	8.02	1.53	11.05	2.47	7.62	1.4	9.96	1.6	90.3	<0.01	1	5.91	1.81	0.08	0.5	12	1	18.7	0.06	0.066	87.4	1.15
24DB-18		76.25	0.03	12.5	1.03	0.16	0.04	0.61	3.68	4.49	<0.01	0.92	0.022	6.41	0.72	1225	0.02	0.46	2.78	3.8	20	6.9	18.1	2.85	13.1	6.73	0.13	10.7	2.32	17.3	4.01	13.6	2.54	18.6	3.02	132.5	0.05	0.8	11.25	5.03	0.06	0.2	8	10.1	18.9	0.08	0.074	76.2	1.51
ZK22033-1		75.24	0.1	14.35	1.15	0.05	0.14	0.35	3.27	5.17	0.11	1	0.063	7.1	0.8	318	0.07	0.26	2.32	4.11	510	15.8	34.5	4.23	14.9	4.05	0.34	4.02	0.66	4.23	0.85	2.48	0.42	2.67	0.42	26.9	0.02	1.7	10.55	0.21	0.41	0.8	9	1.7	21.4	0.17	0.065	50	0.99
ZK23021-3		79.73	0.11	12.19	1.27	0.02	0.1	0.02	0.09	4.39	<0.01	2.52	0.069	6.24	0.9	127	0.06	0.01	0.07	3.61	30	8.2	16	2.34	9.1	2.74	0.29	3.91	0.82	6.31	1.5	4.93	0.88	6.04	0.95	47.3	0.69	6.7	3.56	4.63	<0.02	0.4	10	8.4	16.45	0.16	0.154	76.7	2.31
ZK23013-3		77.35	0.05	12.2	1.09	0.03	0.02	0.13	3.21	4.58	<0.01	0.7	0.031	6.3	0.77	222	0.02	0.1	2.35	3.82	30	27.6	20.5	8.97	37	14.4	0.67	17.9	3.39	24	5.07	15.8	2.82	19.2	3.05	168.5	2.08	0.6	7.07	335	<0.02	0.2	11	12.6	20.4	0.19	0.146	23	32.3
ZK23061-3		77.76	0.08	13.23	0.51	0.02	0.03	0.01	0.07	4.76	<0.01	2.82	0.051	6.78	0.36	178	0.03	0.01	0.07	3.96	20	12.5	22.7	3.33	13.1	4.1	0.27	5.65	1.2	8.8	2.01	6.55	1.06	7.29	1.07	61.1	0.13	2.8	2.82	2.68	<0.02	0.5	8	1.8	17.55	0.2	0.062	42.9	1.16
ZK23148-2		75.94	0.05	13.41	1.22	0.04	0.11	0.6	3.27	4.83	0.01	0.75	0.038	6.79	0.86	310	0.06	0.44	2.4	4.02	40	13.9	20.3	4.37	18.6	6.93	0.34	8.08	1.47	9.95	2.16	6.8	1.08	7.69	1.2	64.2	0.02	2.4	7.68	0.78	0.04	0.5	11	2.7	19.65	0.25	0.04	79.1	1.46
ZK23116-2		76.09	0.05	12.94	1.36	0.08	0.13	0.59	3.09	4.87	0.01	0.72	0.038	6.49	0.91	582	0.07	0.43	2.26	4.02	40	15.7	23.4	4.93	20	7.78	0.39	9.19	1.79	11.55	2.34	7.26	1.12	7.73	1.18	70.1	0.02	0.8	6.48	1.04	0.07	0.6	15	0.4	17.9	0.22	0.051	143	1.48
ZK23178-3		62.35	0.04	23.14	0.98	0.12	0.12	0.15	4.25	7.61	0.01	2.04	0.031	11.1	0.67	842	0.06	0.11	3.03	6.24	40	8.1	9.3	3.01	13.8	8.3	0.2	15.75	3.6	28.6	6.93	24.8	4.36	33.7	5.16	255	0.8	6.2	32.2	10.25	<0.02	0.2	2	3.3	41.8	0.32	0.159	60.2	35.2
ZK23159-2		76.47	0.06	12.38	1.45	0.09	0.11	0.67	2.21	5.42	0.01	1.45	0.037	6.28	0.99	638	0.07	0.5	1.58	4.44	50	13.3	31	4.01	16.6	6.18	0.33	8.1	1.61	10.95	2.38	7.39	1.16	8.19	1.22	72.5	0.61	1.4	10.6	14.55	3.07	0.7	11	69.2	18.05	0.28	0.169	87.3	3.75
Average		75.8814	0.0557143	13.4443	1.07286	0.07	0.0807143	0.361429	2.89	4.91571	0.0266667	1.17286	0.036	6.8	0.74	533.071	0.0457143	0.27	2.10714	4.05357	62.8571	11.7071	21.4857	3.81286	15.8357	6.41357	0.253571	8.93	1.81143	13.115	2.96	9.64357	1.67357	11.9843	1.87429	99.1143	0.419091	2.40714	9.32	78.7586	0.423	0.4	9.28571	9.92857	20.4571	0.160769	0.0897143	62.7929	6.41929
24ZD-1	Zudong	72.24	0.01	11.63	0.72	0.05	0.02	4.56	4.04	3.31	<0.01	3.86	<0.005	4.95	0.49	391	0.01	3.37	3.03	2.8	20	13	42.5	7.25	31.9	18.4	0.08	18.35	3.71	22.3	4.12	12.65	2.37	18.45	2.78	66.1	0.05	1.4	7.2	1.67	<0.02	0.3	7	4.4	28.7	0.18	0.34	36.3	0.63
24ZD-7		75.77	<0.01	13.32	0.82	0.05	<0.01	0.52	3.98	4.62	<0.01	0.69	<0.005	6.45	0.52	395	<0.01	0.38	2.92	3.83	20	7.9	25.5	4.18	18.2	11.4	0.02	13.5	2.95	19.15	3.52	10.2	1.73	12.15	1.75	59.7	0.02	10.6	6.22	2.17	<0.02	0.2	8	1	32.4	0.16	0.179	101	0.78
24ZD-10		75.48	0.02	13.32	1.08	0.02	0.19	0.81	3.29	4.59	<0.01	1.35	0.011	6.84	0.75	220	0.11	0.62	2.46	3.88	10	7.2	18.4	3.26	17	12.2	0.06	24	4.63	31.6	7.06	20.9	3.21	20.8	3.17	292	0.06	13.2	5.77	1.29	<0.02	0.2	9	3	28.4	0.16	0.14	79.9	0.92
24ZD-12		76.01	0.02	13.01	1.12	0.02	0.18	0.47	3.51	4.44	<0.01	1.17	0.009	6.79	0.77	190	0.1	0.36	2.65	3.77	10	6.6	17.1	2.87	15.3	11	0.05	21.4	4.14	28.5	6.28	18.7	2.92	18.95	2.89	238	0.08	5.4	6.12	1.25	<0.02	0.1	8	1.8	27.4	0.15	0.143	91.2	0.78
24ZD-13		76.71	0.01	12.8	1.08	0.02	0.1	0.54	3.43	4.5	<0.01	1.05	0.009	6.59	0.73	199	0.06	0.41	2.54	3.78	10	3.8	6.3	1.55	8.5	6.11	0.05	13.6	2.74	19.9	4.62	14.35	2.38	16.25	2.61	173.5	0.08	13.4	5.25	1.28	<0.02	0.1	9	1.7	27.3	0.13	0.151	83.4	0.88
24ZD-21		76.18	0.01	13.04	1.2	0.02	0.04	0.54	3.9	4.19	<0.01	0.68	0.01	6.68	0.82	207	0.02	0.41	2.95	3.6	10	3.7	7.7	1.66	8.2	5.8	0.05	11.15	2.29	16	3.52	10.6	1.6	9.63	1.37	111.5	<0.01	1.5	7.8	0.66	0.02	0.1	9	0.3	23.7	0.13	0.077	56.3	0.94
24ZD-32		75.24	0.02	13.17	1.29	0.01	0.02	0.54	3.67	4.55	<0.01	0.98	0.01	7.01	0.91	154	0.01	0.43	2.76	3.84	10	6.1	13.3	2.75	14.5	9.42	0.04	15.1	2.87	19.15	4.1	12.6	2.14	14.8	2.33	118.5	<0.01	1.4	4.9	1.1	<0.02	0.1	7	0.4	28.4	0.15	0.147	84.2	0.71
24ZD-33		75.84	0.01	13.02	1.1	0.02	0.03	0.46	3.56	4.58	<0.01	0.99	0.01	6.42	0.73	165	0.02	0.36	2.54	3.68	10	8.9	6.5	4.24	22.2	15.25	0.06	23.1	4.34	26.2	4.91	14.15	2.24	15.05	2.3	139	0.02	1.9	4.4	1.24	<0.02	0.1	6	0.3	28.2	0.18	0.14	90.6	0.66
ZD-3		75.98	0.01	13.18	0.95	0.02	0.06	0.48	3.82	4.62	<0.01	0.79	0.01	6.71	0.66	134	0.03	0.36	2.73	3.81	10	8	9.5	3.04	14.5	8.24	0.09	13	2.51	17.85	3.78	11.75	2.11	14.2	2.24	129.5	0.12	0.9	4.55	2.15	0.13	0.2	10	1.8	28.3	0.22	0.112	23.7	1.06
ZD-10		75.77	0.08	13.24	1.51	0.04	0.08	0.53	3.13	4.74	0.02	1.13	0.054	6.71	1.04	297	0.06	0.4	2.29	3.89	80	32.8	66.5	8.84	33.7	9.84	0.42	11.15	1.97	12.9	2.57	7.14	1.22	7.74	1.21	80.1	0.02	0.8	8.13	1.22	0.03	0.6	9	0.4	23.8	0.2	0.079	73.2	0.99
ZD-19		75.57	<0.01	13.68	1.17	0.03	0.01	0.12	3.96	4.39	<0.01	0.72	0.008	6.92	0.79	217	0.01	0.09	2.84	3.64	10	9.2	7.1	4.52	22.9	14.05	0.04	19.75	3.67	23.5	4.63	13.7	2.38	16.3	2.51	123	0.02	2	5.15	3.27	0.05	0.1	8	0.5	31.2	0.21	0.198	86.5	0.82
ZD-26		74.8	<0.01	13.76	1.33	0.05	0.02	0.56	4.25	4.42	<0.01	0.8	0.008	6.96	0.94	382	0.01	0.42	3.1	3.68	10	6.1	7.9	3.05	14.8	9.35	0.03	13.8	2.68	17.45	3.64	11.7	2.16	15.4	2.39	99.5	<0.01	0.3	4.57	0.33	<0.02	0.2	11	0.6	32	0.16	0.174	202	1.06
ZD-31		76	<0.01	13.06	1.13	0.04	0.03	0.53	3.88	4.31	<0.01	0.79	0.007	6.5	0.78	268	0.02	0.4	2.76	3.57	10	6	6.5	2.8	12.9	7.52	0.03	10.8	2.13	14.3	3.02	9.15	1.7	11.55	1.84	88.2	<0.01	0.4	3.51	0.26	<0.02	0.1	11	0.5	29.9	0.16	0.175	118	1.13
ZK005-22		76.73	0.01	13.11	1.09	0.02	0.04	0.11	3.68	4.4	<0.01	0.81	0.008	6.76	0.77	149	0.02	0.09	2.73	3.68	10	8	4.5	4.08	21.1	15.4	0.06	23.7	4.46	30.1	6.33	18.3	3.16	20.4	3.25	182	<0.01	1.3	4.81	0.18	<0.02	0.1	7	0.4	28.3	0.23	0.173	40.3	0.69
ZK20-10		75.15	0.06	14.07	1.54	0.04	0.07	0.37	3.4	5.35	0.01	0.82	0.047	7.14	1.08	331	0.04	0.29	2.5	4.47	50	21.9	50.9	6.25	24.5	8.17	0.4	10.75	2	14.5	2.99	9.18	1.56	9.96	1.59	92.2	0.16	0.8	7.02	1.78	<0.02	0.6	9	0.5	25.6	0.23	0.098	82	0.93
Average		75.5647	0.0236364	13.1607	1.142	0.03	0.0635714	0.742667	3.7	4.46733	0.015	1.10867	0.0154615	6.62867	0.785333	246.6	0.0371429	0.559333	2.72	3.728	18.6667	9.94667	19.3467	4.02267	18.68	10.81	0.0986667	16.21	3.13933	20.8933	4.33933	13.0047	2.192	14.7753	2.282	132.853	0.063	3.68667	5.69333	1.32333	0.0575	0.206667	8.53333	1.17333	28.24	0.176667	0.155067	83.24	0.865333
24ZB-1	Zhaibei	81.36	0.09	9.81	1.06	0.01	0.04	0.06	2.44	4.38	0.01	0.52	0.053	5.22	0.73	82	0.03	0.05	1.85	3.75	30	31.3	94.7	8.38	29.5	6.74	0.17	7.01	1.36	8.73	1.86	5.38	0.82	5.15	0.72	53.8	0.18	0.3	4.86	0.29	<0.02	0.4	10	1.8	17	0.17	0.038	5.8	0.98
24ZB-2		74.29	0.18	12.1	2.38	0.02	0.14	0.94	2.31	5.38	0.02	1.65	0.105	6.28	1.61	219	0.08	0.71	1.74	4.51	100	72.6	155.5	16.5	61.3	11.55	1.23	10.85	1.72	9.72	1.87	5.04	0.71	4.1	0.64	48.1	0.1	4.9	5.6	0.07	0.04	0.9	10	7.5	22.1	0.28	0.102	30.1	1.19
24ZB-3		76.29	0.07	12.02	1.42	0.02	0.04	0.8	3.01	5.01	<0.01	1.23	0.043	6.18	0.96	187	0.03	0.59	2.26	4.25	10	40	93.9	10.8	39.7	9.47	0.17	10.6	1.8	11.5	2.46	7.24	1.11	6.47	1.03	69	0.06	2.4	7.22	0.22	0.04	0.3	7	1.8	23.8	0.21	0.053	43.6	0.87
24ZB-4		72.68	0.16	13.76	2.14	0.01	0.11	0.31	2.76	7.07	0.02	0.88	0.098	7.18	1.48	121	0.07	0.24	2.04	5.9	90	92	205	22.7	82.7	17.2	1.12	16.9	2.55	15.1	2.93	7.93	1.16	6.79	1.05	74.7	<0.01	0.6	3.82	0.07	0.08	0.6	8	1.2	31.3	0.19	0.128	7.6	1.92
24ZB-6		77.53	0.1	11.4	1.54	0.01	0.03	0.33	2.61	5.34	<0.01	0.9	0.055	5.86	1.05	105	0.02	0.26	1.9	4.38	50	69.4	119.5	18.25	65	14.8	0.22	13.6	2.21	13.75	2.72	7.57	1.1	7.01	1.02	79.5	0.08	<0.2	4.15	0.27	0.12	0.1	8	3.8	22.7	0.14	0.078	10.5	0.91
24ZB-10		76.93	0.07	12.01	1.31	0.01	0.03	0.45	3.21	5.15	<0.01	0.68	0.044	6.36	0.91	95	0.02	0.35	2.38	4.3	20	43.9	84.5	11.65	42.7	10.2	0.22	10.65	1.78	11.2	2.31	6.86	1.02	6.63	0.96	70.2	<0.01	0.3	4.53	0.09	<0.02	0.3	8	0.7	22.8	0.11	0.019	9.7	0.97
24ZB-14		76.03	0.05	12.54	1.36	0.11	0.06	0.69	3.69	4.36	<0.01	0.88	0.032	6.3	0.93	920	0.03	0.51	2.76	3.68	30	14.3	36.2	5.43	22.6	9.91	0.12	13.6	2.73	18.65	4.14	12.45	2.08	13.75	2.13	131.5	<0.01	1	12.1	0.54	<0.02	0.4	12	0.5	20.3	0.06	0.079	218	1.42
ZKS29-2		75.24	0.26	12.27	2.53	0.04	0.25	0.82	2.55	5.49	0.04	1.29	0.136	6.23	1.77	267	0.15	0.62	1.82	4.49	210	70.6	140.5	16.3	59.7	10.4	1.31	8.62	1.27	7.11	1.4	3.89	0.6	3.6	0.54	38.3	0.05	1	2.21	0.24	0.1	2	17	2.7	20.2	0.28	0.059	15.6	2.18
ZK14-11		76.7	0.09	12.35	1.48	0.02	0.06	0.06	1.56	5.72	<0.01	1.41	0.058	6.41	1.04	135	0.04	0.05	1.17	4.82	30	62.8	112.5	16.7	59.9	13.05	0.36	11	1.74	10.9	2.17	5.95	0.98	5.8	0.87	61.2	0.21	1.2	3.18	0.16	0.06	0.2	9	1.4	24.1	0.24	0.042	29.5	1.36
ZK15-21		78.14	0.08	11.76	1.52	0.01	0.05	0.06	1.48	5.69	<0.01	1.24	0.049	5.99	1.06	98	0.03	0.05	1.05	4.66	20	61.6	85.6	16	55.7	12.75	0.2	12.1	2.04	12.85	2.6	7.24	1.14	6.76	1.01	76.3	0.08	1.8	3.76	0.33	0.05	0.2	8	2.9	24.7	0.3	0.074	35.1	1.08
ZBB-3		72.79	0.28	13.58	2.68	0.04	0.27	0.75	2.99	5.75	0.05	0.75	0.174	6.72	1.85	277	0.16	0.54	2.17	4.66	230	93.5	160	21	72.6	12.3	1.56	9.36	1.33	7.93	1.43	3.69	0.55	3.17	0.48	39.4	0.04	1.7	3.1	0.08	0.06	2.1	16	1.1	21.1	0.31	0.069	33.6	1.99
ZK13-11		77	0.08	12.42	1.59	0.01	0.05	0.09	2.11	5.47	<0.01	1.23	0.049	6.15	1.08	108	0.03	0.08	1.6	4.34	20	52.4	64.2	12.35	45.6	10.8	0.16	10.65	1.97	12.3	2.61	7.74	1.11	7.32	1.06	72.4	0.04	6.9	3.96	1.48	<0.02	0.2	6	2.1	25.6	<0.05	0.064	13	1.34
ZKS28-1		75.57	0.03	13.25	1.12	0.09	0.05	0.61	3.94	4.55	<0.01	0.79	0.022	6.17	0.74	673	0.03	0.43	2.75	3.61	20	12	30.5	4.15	17.4	7.46	0.14	10.3	2.11	14.1	3.16	10.35	1.65	11.4	1.69	98.6	0.03	1.1	11.9	3.78	0.03	0.3	10	0.6	20.4	<0.05	0.07	179.5	1.09
Average		76.1962	0.118462	12.2515	1.70231	0.0307692	0.0907692	0.459231	2.66615	5.33538	0.028	1.03462	0.0706154	6.23462	1.17	252.846	0.0553846	0.344615	1.96077	4.41154	66.1538	55.1077	106.354	13.8623	50.3385	11.2792	0.536923	11.1723	1.89308	11.8338	2.43538	7.02538	1.07923	6.76538	1.01538	70.2308	0.087	1.93333	5.41462	0.586154	0.0644444	0.615385	9.92308	2.16154	22.7769	0.208182	0.0673077	48.5846	1.33077
24HL-2	Heling	77.5	0.22	11.74	1.41	0.02	0.17	0.14	1.41	6.24	0.01	0.84	0.128	6.18	0.98	216	0.1	0.12	1.06	5.2	60	39.1	84.5	11.5	42.3	10.05	0.68	8.43	1.51	9.27	1.78	4.87	0.7	4.13	0.57	47.9	0.06	0.4	3.2	0.27	0.03	0.3	10	0.8	16.8	0.14	0.051	18.8	1.38
24HL-3		78.04	0.23	12.04	1.45	0.04	0.19	0.11	1.3	5.67	<0.01	1.07	0.136	6.3	1	398	0.11	0.09	0.97	4.79	60	55.4	118	15.7	57.8	12.75	0.79	10.25	1.61	9.92	1.91	5.1	0.72	4.37	0.58	49.1	0.07	2	3.28	0.22	0.03	0.3	10	0.7	16.7	0.16	0.046	36.5	1.46
24HL-5		78.61	0.22	11.5	1.21	0.03	0.21	0.09	0.51	6.12	<0.01	1.21	0.14	6.12	0.86	255	0.12	0.08	0.39	5.2	40	37	78.5	10.7	40.1	9.68	0.58	8.55	1.55	9.88	1.97	5.25	0.76	4.55	0.63	51.1	0.04	0.6	3.22	0.2	<0.02	0.3	15	0.8	15.4	0.12	0.057	49.4	1.77
24HL-8		72.5	0.38	13.55	2.03	0.05	0.23	0.48	3.63	6.06	0.03	0.31	0.241	7.15	1.42	455	0.12	0.37	2.71	5.17	220	142	293	33.6	118	19.65	1.81	12.9	1.77	9.17	1.68	4.15	0.61	3.59	0.54	44.2	0.01	<0.2	2.64	0.07	0.05	0.6	14	0.5	17.8	0.33	0.057	20.6	2.26
24HL-11		75.91	0.25	12.24	1.58	0.54	0.25	0.35	2.32	5.63	<0.01	0.87	0.15	6.41	1.1	4450	0.13	0.27	1.72	4.8	70	59.1	143.5	15.15	55.7	12.85	0.98	11.8	2.01	12.2	2.35	6.59	0.94	5.42	0.73	66.8	0.02	<0.2	4.05	0.25	0.18	0.6	5	1.1	17.6	0.19	0.049	37.1	2.5
Average		76.512	0.26	12.214	1.536	0.136	0.21	0.234	1.834	5.944	0.02	0.86	0.159	6.432	1.072	1154.8	0.116	0.186	1.37	5.032	90	66.52	143.5	17.33	62.78	12.996	0.968	10.386	1.69	10.088	1.938	5.192	0.746	4.412	0.61	51.82	0.04	1	3.278	0.202	0.0725	0.42	10.8	0.78	16.86	0.188	0.052	32.48	1.874
Blank regions represent untested data.
[truncated: 27 more columns]

## Sheet: S2
Supplementary Table 2 | REE content (ppm) of the regolith samples
Horizon	Sample No.	La	Ce	Pr	Nd	Sm	Eu	Gd	Tb	Dy	Ho	Er	Tm	Yb	Lu	Y	REE	LREE	HREE	LREE/HREE
Saprock	ZK035-H21	32.101	9.79976	10.6541	40.5207	12.3599	0.180896	14.1698	3.1321	19.2303	4.01397	13.4002	2.46708	16.7688	2.50387	121.097	302.4	105.616	196.783	0.536715
	ZK046-H19	33.081	19.2555	11.129	34.8406	8.95995	0.188296	11.9299	2.2359	14.5602	2.99098	9.66517	1.50305	9.42234	1.25994	113.197	274.219	107.454	166.765	0.644348
	ZK046-H20	35.4525	13.9267	10.0706	35.2867	8.84975	0.205533	12.0519	2.36004	14.7673	2.98733	9.52871	1.39583	8.62208	1.13815	117.211	273.855	103.792	170.063	0.610315
	ZK139-H13	48.3215	48.3905	21.1637	55.671	15.9599	0.342492	21.3697	4.35224	28.7504	5.83196	18.7903	3.0211	19.9386	2.82286	201.495	496.221	189.849	306.372	0.619668
Saprolite	ZK025-H6	114.304	12.5748	25.3551	100.602	25.5998	0.86068	38.2795	7.85121	45.1407	9.05994	26.0004	3.78913	20.7386	2.69786	303.093	735.946	279.296	456.65	0.611619
	ZK025-H12	143.805	8.59996	30.1454	124.402	30.3398	1.06298	48.7894	10.7912	66.331	13.7099	39.6207	5.60819	30.1479	3.9018	506.288	1063.54	338.355	725.188	0.466576
	ZK025-H13	127.904	4.61146	26.6456	112.302	27.1098	0.911779	43.4895	9.68755	59.3609	12.3299	35.2406	4.96517	26.7881	3.46182	452.289	947.097	299.485	647.612	0.462444
	ZK025-H17	89.8428	6.05143	19.9868	83.9015	20.3599	0.572687	29.5896	6.35413	38.3906	7.77395	22.6004	3.30111	17.9287	2.28188	280.993	629.929	220.715	409.214	0.539364
	ZK046-H10	130.01	14.8403	29.2647	120.848	33.0105	1.05983	52.6371	11.7284	74.7239	15.2903	47.7879	6.9323	43.2885	5.70182	589.917	1177.04	329.033	848.007	0.388008
	ZK095-H11	162.861	31.0755	41.4784	164.296	51.1653	2.74167	79.9615	17.347	106.529	22.0621	68.9948	10.6243	66.7568	9.21049	726.609	1561.71	453.618	1108.09	0.409368
Pedolith	ZK062-H1	18.7806	11.4107	7.23592	22.3304	6.34096	0.151897	8.0139	1.87824	13.0302	2.86698	9.86817	1.84106	13.0691	1.9179	89.9678	208.704	66.2504	142.453	0.465068
	ZK062-H2	46.9515	13.7809	15.0933	59.6211	16.2399	0.478289	17.8498	4.16933	26.3704	5.49797	18.1403	3.33511	23.5684	3.41083	158.596	413.103	152.165	260.938	0.583146
	ZK062-H3	40.2213	10.8968	12.7498	50.1509	14.6899	0.44849	17.3898	4.19385	27.2804	5.68996	18.9503	3.42411	24.3683	3.51182	167.396	401.362	129.157	272.204	0.474486
	ZK139-H1	72.8323	52.2814	29.7737	93.3017	27.3998	0.679085	34.7496	7.63457	46.5507	9.70194	30.2605	5.11917	33.3877	4.63376	313.892	762.198	276.268	485.93	0.568534

## Sheet: S3
Supplementary Table 3 | TIMA analysis of minerals content (mass%) of different horizons samples
Horizon	Bedrock											Saprock				Saprolite						Pedolith
Sample No.	025-7	030-1	030-6	031-1	042-1	119-1	139-3	141-1	152-1	153-2	160-1	035-H21	046-H19	046-H20	139-H13	025-H6	025-H12	025-H13	025-H17	046-H10	095-H11	062-H1	062-H2	062-H3	139-H1
Depth	32.5 m	23 m	28.5 m	26 m	26 m	22.4 m	32.1 m	31 m	17 m	21 m	22.5 m	19.8 m	17.5 m	18.5 m	11.3 m	5.1 m	11.1 m	12.3 m	15.8 m	8.9 m	10.3 m	0.5 m	1.2 m	2 m	0.5 m
Quartz	49.8212	52.1548	36.8439	54.7689	58.708	44.9891	32.072	36.5333	32.1757	52.6709	63.2791	42.6298	28.152	46.2326	41.829	37.1382	45.1764	30.3207	23.02	54.759	39.2389	29.6496	27.1761	34.2451	34.5336
Orthoclase	22.3748	22.3281	27.1103	19.0439	19.9298	25.1989	28.7358	28.6612	30.9572	28.1603	20.9137	0.0516495	29.9252	27.9877	23.9704	20.3683	24.7858	34.4944	27.5842	20.1527	6.58419	8.1379	12.5464	23.8419	18.4527
Albite	20.0824	11.6551	20.7078	15.9475	12.397	22.0814	21.5646	24.3403	26.7002	6.58111	7.87395	0.0339792	10.1903	3.16524	2.69451	0.0433563	0.228916	0.165806	2.00982	0.518703	0.0206146	0.296638	0.15354	0.574805	1.79277
Biotite	3.73416	1.14252	2.70431	3.69792	3.45719	2.91153	11.5304	2.81448	2.50854	1.4079	0.843247	6.01326	10.252	2.97405	3.71497	5.36071	4.14352	5.42183	4.03924	5.40206	8.38531	5.06145	5.0735	6.3334	7.03556
Kaolinite	0.576266	3.0568	3.06579	1.87935	1.59955	0.433435	1.99456	0.610389	2.18287	2.15393	0.779539	47.1822	14.6951	16.2753	24.0245	32.9817	22.3488	26.6898	40.9455	17.5565	40.4522	53.2795	52.2312	30.2347	35.1565
Aluminosilicates mix	0.722939	1.69043	1.95469	1.43362	0.925116	1.21417	0.368904	1.06219	1.70123	3.69515	0.889382	0.742154	1.4754	1.36964	1.7663	0.578141	0.480249	0.367133	0.427923	0.359662	0.884145	0.252305	0.626578	1.26359	0.391569
Other silicates	0.548976	1.00403	1.01457	0.793915	0.799169	0.682009	0.768026	0.664414	0.845337	1.96123	0.765791	0.705849	1.84513	0.953809	0.87267	0.838098	0.809197	0.496747	0.720559	0.239783	0.927343	1.00905	0.461788	0.979669	0.921371
Chlorite	0.329934	0.614914	0.443375	0.00991804	0.00338287	0.532416	0.45856	1.52968	0.021658	0.498147	2.11817	0.00935748	0.055311	0.0617899	0.0119869	0.307837	0.2051	0.315659	0.0430329	0.0717522	0.216952	0.0108542	0.0674994	0.00419212	0.0186376
Fluorite-Ⅱ	0.335143	0.633026	0.633227	0.265139	0.497109	0.265684	0.662586	0.945974	0.740842	0.324463	0.54841	0.00010815	0.00015362	0.000160524	0.000405612	0.000401317	0.00391706	0.000225712	0.000218582	0.00034166	0.000599338	0.00024815	0.000432675	0.000339255	0.000430998
Muscovite	0.0278623	1.34168	0.116369	0.585475	0.21904	0.0260437	0.0521017	0.0470436	0.068202	1.20432	0.265053	0.0340109	0.826003	0.522757	0.342717	0.398624	0.272363	0.178779	0.118157	0.147175	0.429222	0.559466	0.405751	0.506654	0.346678
Illite	0.35526	0.00416579	0.970013	0.00104042	0.00058328	0.414024	0.525408	0.539129	0.819882	0.000154683	0.00017376	0.000104034	1.71196	0.000289922	0.00135074	0.671652	0.600406	0.488313	0.325054	0.516758	1.76413	1.10537	0.742588	1.17396	0.923657
Fluorite-Ⅰ	0.185529	0.279657	0.279959	0.209148	0.452715	0.464265	0.501789	0.207192	0.295819	0.351514	0.0818846	0.000963516	-	0.000126473	0.00026685	6.32212e-05	0.00363379	0.000232416	0.000247577	0.000503499	0.000327638	0.000171796	0.000132711	0.000214685	0.000478887
Siderite	0.000642948	1.44722	1.44768	0.000713878	0.000661769	0.000220144	-	0.00093824	0.000136149	0.000778056	0.000124332	6.46743e-05	0.000340533	0.000111993	0.0465873	0.00559441	0.00547854	0.00731202	0.000132047	0.00102779	0.000609772	0.00044199	0.0026333	5.23041e-05	0.000597159
Hematite/Magnetite	0.159228	0.0861978	0.0864435	0.062925	0.0742845	0.0216136	0.0534083	0.621994	0.000948273	0.0435926	0.0266773	0.00364035	0.0453591	0.00565822	0.0716898	0.197289	0.156839	0.227154	0.0785474	0.0138423	0.0973614	0.00307435	0.0412147	0.00329754	0.0670861
Zircon	0.0743291	0.0859933	0.0860205	0.0263319	0.0199399	0.0496427	0.0980373	0.118735	0.02052	0.0601413	0.0351705	0.00759053	0.0298179	0.0183547	0.0235597	0.0440777	0.0489871	0.0422572	0.052133	0.0252363	0.0342661	0.0186487	0.0244001	0.0268109	0.0194023
Rutile	0.111358	0.0962339	0.0954407	0.00220767	0.000384195	0.0349544	0.0877214	0.104396	0.0191777	0.0641277	0.0472406	8.32927e-05	0.0267775	0.0217587	0.00637138	0.0541689	0.0457005	0.0894305	0.0833013	0.0189043	0.069892	0.0208879	0.0081011	0.0132403	0.0102925
Synchysite	0.0175075	0.0217301	0.0212526	0.0381533	0.0270913	0.0180276	0.0674359	0.162701	0.0310732	0.0244442	0.0126944	0.00395752	0.00187046	0.00236623	0.0190396	0.00422038	0.00241022	0.00176628	0.000447937	0.000636841	0.00357904	0.00300501	0.00119424	0.00677893	0.00391715
Topaz	0.0983275	0.0192705	0.0192766	0.0770993	0.103033	0.0182316	0.00329215	-	0.00992964	0.000153983	0	1.81965	0.0972839	0.0776686	0.0513687	0.00129447	0.00614079	0.00239588	0.0108357	0.00862165	0.000870357	0.382429	0.0740481	0.0922164	0.0341637
Ferosaponite	0.000364495	0.0616784	0.0588114	0.000872264	0.00147033	0.00546176	0.00347509	0.0063743	0.000443151	0.0864921	0.0794998	0.000980061	0.000574477	0.00535595	0.00183002	0.00255584	0.00120301	0.00166013	0.000308132	0.00018016	0.000694117	0.00017212	0.000363942	-	0.000504668
Schorl	0.000257013	0.0667576	0.0698558	0.000414493	0.00168523	6.86365e-05	0.000255245	8.43953e-05	0.00324492	0.000907103	0.000186588	0.0807292	0.00925539	0.025146	0.0345427	0.0414055	0.0270767	0.00955086	0.075822	0.00451803	0.0137572	0.0225338	0.0250113	0.0943715	0.0274922
Ilmenite	0.0171265	0.00358215	0.0034966	0.000899207	0.00229587	0.00438839	0.00272065	0.0670351	0.000509745	0.00515605	0.0242234	-	0.000452087	0.000190696	0.000393343	0.00121551	0.000209367	0.00126157	0.000940839	0.000767608	0.000388461	0.00105363	0.00277379	0.000132997	0.00085216
Pyrite	-	0.0402154	0.0402322	0.010127	0.000398763	0.000240989	0.000165719	-	0.000974164	0.000430449	0.000159268	0.000980591	0.000297306	5.66108e-05	0.00095364	0.000740445	0.000416923	0.00113349	0.000478459	0.000292274	0.00248145	0.000152403	0.000102736	-	0.000211165
Monazite	0.0218513	0.00308977	0.0023402	0.00381447	0.0003182	0.00201086	0.0215933	0.00429514	0.00747619	0.00694918	0.00129818	0.00258636	0.00759712	0.00616299	0.00408631	0.00205051	0.00289872	0.00302448	0.00283542	0.00286814	0.0218397	0.0129398	0.0179412	0.0278391	0.00268963
Columbite	0.00841989	0.00428144	0.00426835	0.00557001	0.00825652	0.00722259	0.0241594	0.000301333	0.0035687	0.000337884	0.0021622	0.00129349	0.00952386	0.00249585	0.00516778	0.00904074	0.00921002	0.00417494	0.0149458	0.0115939	0.00713971	0.00323122	0.00309969	0.00351949	0.00432073
Goethite	0.00454424	0.00795294	0.00795545	0.00679653	0.00665875	0.00207722	0.000248322	0.0226485	0.00013081	0.000308517	0.000948773	0.000204802	0.00091824	0.000253319	0.0065592	0.00959524	0.0079025	0.0206468	0.00354082	0.00171079	0.00357453	0.000167421	0.00244954	0.000122043	0.0108909
Oxidic copper species	0.000604707	0.00276167	0.00276255	0.00246132	0.000382163	-	0.0381477	0.00431609	0.00403204	-	-	-	8.30569e-05	-	-	-	-	0.187009	7.46933e-05	-	0.00101629	7.99053e-05	0.000478347	0.00530649	0.00042085
Sphalerite	5.22059e-05	0.0239513	0.0233341	-	-	-	0.000254342	0.000153442	0.000911785	0.000586887	0.000390086	0.000156051	8.17985e-05	-	-	0.000156706	0.000105199	0.000251913	6.35782e-05	6.47196e-05	0.000469382	0.000187968	5.65319e-05	-	-
Thorite	0.00719051	0	0.00536849	0	0	0.00909608	0.0219447	0.00103592	0.00389598	0	0	-	0.00514002	-	-	0.00691114	0.00568973	0.0124999	0.0124518	0.0112977	0.00872215	0.000355134	0.00202694	0.00399413	0.00398715
Samarskite	0.00305688	0.00569773	0.00567481	0.00385201	0.00458846	0.0046959	0.00655962	0.00301512	0.00203311	0.00168702	0.00316892	0.00137202	0.00206917	0.000681657	0.00395135	0.00320992	0.00362821	0.00350223	0.00696999	0.00164259	0.0242318	0.00389201	0.00670433	0.00470456	0.0022272
Xenotime	0.00253106	0.00392774	0.0039197	0.00196207	0.00106955	0.00202101	0.0101892	0.00769923	0.00661501	0.000216102	0.00107804	0.00181529	0.00118223	0.000460579	0.00112857	0.00789033	0.00484034	0.00955364	0.007388	0.00201477	0.0088737	0.00147603	0.00166395	0.00325822	0.000736004
Bastnäsite	0.00134446	0.00522032	0.0051949	0.000237959	0.00378711	0.00153841	0.0061708	0.0023028	0.00059465	0.00146257	0	-	-	-	0.000368626	-	-	-	-	-	-	-	-	-	-
Chromite	-	-	-	-	-	-	-	-	-	0.0227158	-	0.000334396	-	-	-	-	-	-	-	-	-	-	-	-	-
Cassiterite	-	0.00318832	0.00318933	0.000168922	0.0145237	-	0.000584987	-	-	-	8.04661e-05	0.00960119	-	-	7.95232e-05	-	-	0.000153687	0.000107372	5.49619e-05	0.00134947	0.000126897	0.000283384	0.000157969	6.68214e-05
Allanite	0.000427255	0.000294744	0.000176	0.000401006	0.000258632	0.000626921	0.00121871	0.00782009	0.000543483	0.00070255	0.00587297	-	-	-	-	-	-	-	-	-	-	-	-	-	-
Al2SiO5 polymorphs	0.0110712	0.00144893	0.00144938	0.00154658	0.00201802	0.000515807	0.000180377	-	0.000702699	-	0	0.0469784	0.0104036	0.00278743	0.0011141	0.000260081	0.000736212	0.000185018	0.000933844	0.00023631	0.000456816	0.00738023	0.0111335	0.00339177	0.000743696
Ferro-Actinolite	0.00118102	0.00202898	0.00202962	0.000589263	0.000515522	0.00065891	0.002198	0.00367099	0.000797769	0.000920541	0.00179038	-	0.00128025	-	-	-	0.000116816	0.000149678	-	0.000156124	0.000669029	0.000174726	5.88512e-05	7.39655e-05	6.74025e-05
Galena	0.000198115	0.00168511	0.00168564	-	0.00604511	-	-	-	0.000568703	0.000292269	-	-	-	-	-	0.000317613	-	-	-	-	-	-	-	-	-
Calcite	0.000817974	0.000717674	0.000717901	0.00016164	0.000669764	0.000377229	0.00177007	0.00201177	0.00041544	0.00151202	0.111833	6.63891e-05	0.000225463	0.000177371	0.000295512	0.000153437	0.000255037	0.00109254	0.000335357	0.000577439	0.0042161	0.000127176	0.000247152	0.000326918	0.000104977
Apatite	0.000301965	0	0	0	0	0	0	0.00669379	0	0	0.000859023	-	-	-	-	-	-	-	-	-	-	-	-	-	-
Wolframoixiolite	-	-	-	-	0.00414479	-	0.000966048	-	0.000839847	8.84155e-05	-	0.00131578	-	-	0.00164335	-	-	-	-	-	0.000799914	0.000751839	0.00274548	0.00105546	0.000915232
Cuprite	0.000102728	0.000693348	0.000693567	0.000293243	-	-	0.00194318	0.000712085	0.00167779	-	-	-	-	-	-	-	-	0.00274454	-	-	0.000750357	-	0.00031316	0.00350746	-
Huttonite	-	0.00183002	-	0.000287812	0.00104614	-	-	-	-	0.0019078	-	0.00186968	5.92864e-05	0.00233401	0.00441207	0.000300079	0.000184263	-	7.46192e-05	-	0.000450267	-	7.36244e-05	0.000177341	0.00012465
Molybdenite	0.00027312	0.00110851	0.00110886	-	-	-	-	0.00105105	-	-	-	-	-	-	-	-	-	-	-	-	-	-	-	-	-
Plumalsite	-	0.000621869	0.000622066	8.71316e-05	0.000286809	0.000171372	-	-	0.000133722	0.000150059	-	-	0.000115567	0.000246046	-	7.1504e-05	-	-	-	-	0.000103938	-	-	-	-
Titanite	0.000403743	0.000332007	0	0	0	0	6.31089e-05	0.00045717	0	5.6094e-05	0.00102327	-	-	-	-	-	-	-	-	-	-	-	-	-	-
Tantalite	-	-	-	-	0.000969217	-	-	-	-	-	-	0.000155806	-	-	-	-	-	-	-	-	-	-	-	-	-
Plagioclase	0.000101838	0.000197845	-	0.000137185	0.000215597	-	-	-	-	5.22544e-05	-	-	-	-	-	-	-	-	-	-	-	-	-	-	-
Corundum	5.87262e-05	-	-	-	-	5.0777e-05	0.000483601	-	-	7.99914e-05	-	0.0019043	0.000109065	0.00801893	0.0097059	8.03621e-05	0.00235933	5.93959e-05	0.000103741	0.000244275	0.0900605	0.000162347	0.000372048	0.0039413	0.000152181
Gibbsite	-	-	-	-	-	-	-	-	-	6.89926e-05	-	0.00475552	-	0.000157971	0.000371108	5.67101e-05	-	-	-	-	0.00141664	0.000299011	0.000156973	0.000186322	-
Unclassified	0.354416	2.08409	2.1442	1.10579	0.709262	0.594537	0.30466	0.879024	0.848269	0.655104	1.21601	0.603354	0.620231	0.274411	0.473009	0.918383	0.608449	0.430635	0.412857	0.167603	0.691585	0.150047	0.281268	0.538792	0.232425
The rest	0.00731138	0.010727	0.0104492	0.0102243	0.0150232	0.00847635	0.00530762	0.0150874	0.0123968	0.00951849	0.0689287	0.00110325	0.000425918	0.00163836	0.00263211	0.00177996	0.000877472	0.000747104	0.00045325	0.000970503	0.00449646	0.00357728	0.00364011	0.00419595	0.00151229
Total	100	100	100	100	100	100	100	100	100	100	100	100	100	100	100	100	100	100	100	100	100	100	100	100	100
‘-’ are below the detection limit.
Bolded are the REE-bearing minerals.

## Sheet: S4
Supplementary Table 4 | Electron microprobe data (wt.%) for REE-bearing minerals in bedrock
Mineral	Positon	Ca	F	La	Ce	Pr	Nd	Sm	Eu	Gd	Tb	Dy	Ho	Er	Tm	Yb	Lu	Y	Total	REE	LREE/HREE
Fluorite-Ⅰ	031-1-P1	45.6681	48.056	0.1474	0.3567	0.0172	0.2737	0.1301	-	0.4589	0.0942	0.5345	-	0.4519	0.2036	0.583	-	3.1998	100.175	6.451	0.167412
Fluorite-Ⅰ	031-1-P2	45.6201	47.5763	0.1378	0.5177	0.0957	0.457	0.1129	-	0.5587	0.1296	0.4665	0.1052	0.251	0.1211	0.576	0.1917	3.3552	100.272	7.0761	0.229557
Fluorite-Ⅰ	031-1-P3	45.2662	47.8779	0.053	0.5685	-	0.5753	0.1506	-	0.4463	0.0406	0.3571	0.1212	0.2981	0.0751	0.4574	0.1472	3.8785	100.313	7.1689	0.231452
Fluorite-Ⅰ	031-1-P4	44.7609	47.6364	0.2138	0.6604	0.4568	0.4025	0.219	-	0.3691	0.1413	0.3559	0.0793	0.2692	-	0.4916	0.2529	3.05	99.3591	6.9618	0.389775
Fluorite-Ⅰ	031-1-P5	45.0123	47.7316	0.2054	0.6142	-	0.4457	0.193	-	0.3934	-	0.3812	0.2202	0.3006	-	0.3882	-	3.4389	99.3247	6.5808	0.284685
Fluorite-Ⅰ	031-1-P6	45.3414	47.4819	-	0.4384	-	0.3335	0.2299	-	0.6854	0.1638	0.2921	-	0.4328	-	0.4729	0.0612	3.258	99.1913	6.368	0.186687
Fluorite-Ⅰ	031-1-P7	49.5557	48.4666	0.0285	-	-	0	0.1255	-	-	-	-	0.009	0.2182	0.0752	0.2575	0.137	1.3098	100.183	2.1607	0.0767429
Fluorite-Ⅰ	031-1-P8	49.09	48.4706	-	0.1283	0.0525	0.1135	0.0106	-	-	0.0681	0.139	0.0053	0.11	0.1501	0.189	-	1.6068	100.137	2.5762	0.13574
Fluorite-Ⅰ	031-1-P9	50.3899	48.6108	-	-	-	-	-	0.0748	-	-	0.0688	0.0008	-	0.0894	-	0.0509	0.5498	99.8352	0.8345	0.0984599
Fluorite-Ⅰ	031-1-P10	50.8705	47.3487	-	0.1199	-	0.0177	0.0074	-	-	-	-	-	-	-	-	0.2254	0.6725	99.2621	1.0429	0.161488
Fluorite-Ⅰ	031-1-P11	50.9054	48.7544	0.0575	0.0911	0.1304	-	0.021	0.0414	0.0455	-	-	0.0454	-	0.0452	0.1188	-	0.0713	100.327	0.6676	1.0466
Fluorite-Ⅰ	031-1-P12	48.544	48.2149	0.0835	0.0889	0.0865	-	0.018	-	0.238	0.1594	0.1127	-	0.1544	-	0.3448	-	1.5189	99.564	2.8051	0.109525
Fluorite-Ⅰ	031-1-P13	45.8978	48.1423	0.3621	0.9273	0.1051	0.5912	0.2647	-	0.484	0.1294	0.3175	-	0.2378	0.0038	0.3487	-	3.0832	100.895	6.8548	0.48875
Fluorite-Ⅰ	031-1-P14	45.1635	47.7695	0.1341	0.6698	0.1898	0.6199	0.2451	-	0.3151	0.0854	0.5557	0.2059	0.3404	0.1056	0.2467	-	3.1376	99.7841	6.8511	0.372306
Fluorite-Ⅰ	031-1-P15	44.6789	47.4538	0.5522	1.3748	0.143	0.7019	0.0937	-	0.3265	-	0.532	0.1478	0.1256	0.0316	0.3471	-	2.4648	98.9743	6.8416	0.720724
Fluorite-Ⅰ	035-4-P3	44.8054	50.0191	0.2007	0.6608	-	0.3421	-	-	-	-	-	-	-	-	0.4098	-	2.7963	99.2342	4.4097	0.375409
Fluorite-Ⅰ	035-4-P5	47.2502	50.1321	0.0139	0.2027	-	0.0064	-	-	-	-	-	-	-	-	0.401	-	2.8589	100.865	3.4829	0.068407
Fluorite-Ⅰ	Average	46.9894	48.2202	0.128818	0.436441	0.0751176	0.287082	0.107147	0.00701176	0.254171	0.0595529	0.241941	0.0553	0.187647	0.0529824	0.331324	0.0627235	2.36766	99.8645	4.65492	0.302572
Mineral	Positon	Ca	F	La	Ce	Pr	Nd	Sm	Eu	Gd	Tb	Dy	Ho	Er	Tm	Yb	Lu	Y	Total	REE	LREE/HREE
Fluorite-Ⅱ	025-7-P1	49.76	47.153	0.0937956	0.0759858	0.18713	0.0325795	0.0301826	-	-	-	-	-	0.0411026	0.013134	0.0237117	0.0510043	0.561448	98.0231	1.11007	0.60787
Fluorite-Ⅱ	025-7-P2	48.8669	47.843	0.0255806	0.00426887	-	0.0548707	-	0.0405898	-	-	-	0.00872976	-	0.0052536	-	0.0123114	0.297654	97.1592	0.449259	0.38682
Fluorite-Ⅱ	031-2-P1	49.5557	48.4666	0.0285	-	-	-	0.1255	-	-	-	-	0.009	0.2182	0.0752	0.2575	0.137	1.3098	100.183	2.1607	0.0767429
Fluorite-Ⅱ	031-2-P2	49.09	48.4706	-	0.1283	0.0525	0.1135	0.0106	-	-	0.0681	0.139	0.0053	0.11	0.1501	0.189	-	1.6068	100.137	2.5762	0.13574
Fluorite-Ⅱ	031-2-P3	50.3899	48.6108	-	-	-	-	-	0.0748	-	-	0.0688	0.0008	-	0.0894	-	0.0509	0.5498	99.8352	0.8345	0.0984599
Fluorite-Ⅱ	031-2-P4	50.8705	47.3487	-	0.1199	-	0.0177	0.0074	-	-	-	-	-	-	-	-	0.2254	0.6725	99.2621	1.0429	0.161488
Fluorite-Ⅱ	031-2-P5	50.9054	48.7544	0.0575	0.0911	0.1304	-	0.021	0.0414	0.0455	-	-	0.0454	-	0.0452	0.1188	-	0.0713	100.327	0.6676	1.0466
Fluorite-Ⅱ	031-2-P6	48.544	48.2149	0.0835	0.0889	0.0865	-	0.018	-	0.238	0.1594	0.1127	-	0.1544	-	0.3448	-	1.5189	99.564	2.8051	0.109525
Fluorite-Ⅱ	046-1-P1	50.1569	47.405	-	0.0392736	0.0136716	-	0.0224214	0.0215903	-	-	0.00174264	0.128327	-	0.0157608	-	0.0949736	0.035435	97.9351	0.373196	0.350988
Fluorite-Ⅱ	046-2-P1	49.949	47.583	0.0306967	0.0879386	-	0.0128603	-	-	0.0893621	-	-	0.0515056	-	-	0.021077	-	0.0732323	97.9029	0.370991	0.577496
Fluorite-Ⅱ	046-2-P2	49.9675	47.66	-	0.018783	0.12219	-	-	-	0.0425121	0.052128	-	-	0.00961975	0.0157608	-	-	0.0385848	97.9271	0.299578	0.888827
Fluorite-Ⅱ	046-7-P1	50.2677	47.295	-	0.0614717	-	0.0317221	0.0370815	0.0224539	0.0442472	-	0.00348528	-	-	0.0621676	0.0491798	0.0554013	0.345688	98.2756	0.712898	0.272648
Fluorite-Ⅱ	046-7-P2	49.8796	47.645	0.084416	0.241618	-	0.120887	0.0293203	-	0.0321009	-	0.0958452	-	0.0472242	0.008756	-	-	0.558298	98.7431	1.21847	0.64164
Fluorite-Ⅱ	Average	49.8618	47.8808	0.0310761	0.0736569	0.0455686	0.0295476	0.0231928	0.0160117	0.0378248	0.0215098	0.0324287	0.0191587	0.0446574	0.0369794	0.077236	0.04823	0.587649	98.8673	1.12473	0.411911
Mineral	Positon	SiO2	ZrO2	FeO	CaO	NaO	P2O5	La2O3	Ce2O3	Pr2O3	Nd2O3	Sm2O3	Eu2O3	Gd2O3	Tb2O3	Dy2O3	Ho2O3	Er2O3	Tm2O3	Yb2O3	Lu2O3	Y2O3	ThO2	UO2	HfO2	Total	RE2O3	LREE/HREE
Zircon	025-7 Zrn-1	33.193	65.379	0.054	0.003	-	-	-	0.037	-	0.004	-	-	-	0.031	0.019	-	0.024	0.083	0.017	0.017	-	-	0.069	-	98.93	0.232	0.21466
Zircon	025-7 Zrn-3	33.92	64.203	0.038	0.035	-	-	0.028	0.018	-	0.115	0.017	0.054	-	-	0.012	-	0.059	0.031	0.074	-	0.211	0.058	0.228	-	99.181	0.619	0.599483
Zircon	025-7 Zrn-4	33.183	64.651	-	-	-	-	-	-	-	0.005	-	-	-	-	0.037	-	0.086	0.093	0.032	0.09	-	0.066	-	-	98.342	0.343	0.0147929
Zircon	032-4 Zir-1	33.647	58.307	0.065	0.011	-	0.083	-	-	-	-	0.068	-	0.037	-	0.087	-	0.184	-	0.268	0.084	0.721	0.438	0.492	-	94.492	1.449	0.0492397
Zircon	032-4 Zir-2	32.248	63.075	0.096	0.069	-	0.263	0.019	-	-	-	0.014	-	0.113	-	0.068	-	0.35	0.088	0.395	0.115	1.444	0.275	0.477	-	99.109	2.606	0.0128255
Zircon	032-4 Zir-3	32.317	63.709	0.096	0.069	-	0.266	0.019	-	-	-	0.014	-	0.114	-	0.068	-	0.351	0.089	0.397	0.116	1.461	0.274	0.477	-	99.837	2.629	0.0127119
Zircon	035-4-P4	33.2422	60.2907	0.0444	0.1251	0.0088	0.2925	-	-	-	-	-	-	-	-	-	-	-	-	0.0705	-	0.5539	0.144	0.557	2.8895	98.3	0.6244	0
Zircon	119-1-P3	33.4282	60.1043	0.1371	0.1236	-	0.1904	-	-	-	-	-	-	-	-	-	-	-	-	0.1869	-	1.1591	0.5853	0.8002	1.3028	98.045	1.346	0
Zircon	064-1-P18	33.7998	60.2534	0.2232	0.0053	-	0.1286	-	-	-	-	-	-	-	-	-	-	-	-	0.0495	-	0.0642	-	0.4452	3.7115	98.7024	0.1137	0
Zircon	064-1-P7	33.6055	60.9012	0.1386	0.0008	0.0208	0.342	-	-	-	-	-	-	-	-	-	-	-	-	0.2215	-	0.4412	0.1008	0.4202	1.7412	97.9454	0.6627	0
Zircon	Average	33.2584	62.0874	0.08923	0.04418	0.00296	0.15655	0.0066	0.0055	-	0.0124	0.0113	0.0054	0.0264	0.0031	0.0291	-	0.1054	0.0384	0.17114	0.0422	0.60554	0.19411	0.39656	0.9645	98.2884	1.06248	0.0903713
Mineral	Positon	TiO2	SiO2	Al2O3	FeO	CaO	La2O3	Ce2O3	Pr2O3	Nd2O3	Sm2O3	Eu2O3	Gd2O3	Tb2O3	Dy2O3	Ho2O3	Er2O3	Tm2O3	Yb2O3	Lu2O3	Y2O3	ThO2	UO2	Nb2O5	Ta2O5	Total	RE2O3	LREE/HREE
Rutile	025-1 Rt-6	88.7453	0.5321	0.2535	4.8064	0.021	-	0.2236	-	0.0131	-	-	-	-	0.0675	0.0079	-	-	0.0349	0.0925	0.033	-	-	3.6301	0.1961	98.657	0.4725	1.00382
Rutile	025-7 Rt-7	96.4219	0.0737	0.1046	0.687	0.0916	-	0.2831	-	0.0504	0.0204	0.0263	-	0.0565	-	0.0765	-	-	-	0.0303	0.0347	-	0.0275	1.7322	0.1583	99.875	0.5782	1.9202
Rutile	025-7 Rt-8	95.5427	0.2413	0.2836	0.944	0.503	-	0.3701	0.0697	-	0.0126	0.0563	0.1348	0.0053	0.0011	0.0206	-	-	0.0031	0.0473	-	0.047	-	2.4304	0.0488	100.762	0.7209	2.39727
Rutile	062-1 Rt-4	95.8255	0.3149	0.183	0.9928	0.0053	-	0.4287	0.0616	0.018	0.0005	0.0034	-	-	0.0108	0.0208	0.1127	0.0203	-	0.0114	0.0349	-	-	2.2321	0.1631	100.44	0.7231	2.42864
Rutile	062-1 Rt-5	91.6865	0.1203	0.0489	5.6293	-	-	0.4035	-	-	0.0044	-	0.1318	0.0316	0.1461	0.0387	-	-	-	0.0052	0.0332	0.0076	-	1.0991	0.0206	99.4068	0.7945	1.0551
Rutile	Average	93.6444	0.25646	0.17472	2.6119	0.12418	-	0.3418	0.02626	0.0163	0.00758	0.0172	0.05332	0.01868	0.0451	0.0329	0.02254	0.00406	0.0076	0.03734	0.02716	0.01092	0.0055	2.22478	0.11738	99.8281	0.65784	1.761
Mineral	Positon	CaO	F	SiO2	FeO	La2O3	Ce2O3	Pr2O3	Nd2O3	Sm2O3	Eu2O3	Gd2O3	Tb2O3	Dy2O3	Ho2O3	Er2O3	Tm2O3	Yb2O3	Lu2O3	Y2O3	ThO2	UO2	Total	RE2O3	LREE/HREE
Synchysite	032-4 Syn-2	2.901	5.854	0.33	0.306	4.903	17.678	3.078	9.463	2.774	-	4.352	-	3.332	0.156	0.384	0.173	-	0.499	12.386	3.852	0.032	72.453	59.178	1.78066
Synchysite	032-4 Syn-1	16.462	7.471	1.675	0.853	4.632	15.184	2.776	8.854	2.453	-	3.574	-	3	0.288	0.395	0.232	-	0.455	15.143	5.046	-	88.493	56.986	1.46832
Synchysite	046-7 Syn-1	17.888	5.038	1.353	0.158	4.941	11.738	2.126	5.758	1.816	-	2.629	-	2.283	0.434	0.623	0.219	0.237	0.352	14.324	1.335	-	73.252	47.48	1.25013
Synchysite	046-7 Syn-1	19.0044	2.2322	0.0164	0.1019	5.1441	12.6996	1.6612	6.2593	1.7029	0.3325	2.3793	0.2846	2.1501	1.7914	1.379	0.3701	0.7193	0.3735	13.8213	1.0674	-	73.4905	51.0682	1.19473
Synchysite	046-7 Syn-2	19.8273	2.6576	-	-	3.3638	6.8395	0.9075	3.8738	1.1922	0.3836	2.2949	0.377	2.0044	1.5612	1.3677	0.1441	0.4494	0.5874	22.2586	0	-	70.09	47.6051	0.533437
Synchysite	025-7 Syn-1	18.4856	4.2034	-	0.149	4.7708	14.0894	2.1248	4.758	2.6751	0.5162	3.4182	0.635	2.5593	-	1.2194	0.3484	0.3977	0.051	12.2785	0.0251	0.3317	73.0366	49.8418	1.38392
Synchysite	025-7 Syn-2	18.1908	4.101	0.1226	0.1115	5.3133	14.9476	1.6474	5.4987	2.091	0.6643	4.9357	0.3693	1.4608	-	-	0.8925	0.0944	0.3652	12.2874	0.0516	0.1122	73.2573	50.5676	1.47816
Synchysite	025-7 Syn-3	15.9471	4.8784	0.0846	0.4761	6.3484	14.4399	1.42	6.6341	2.1476	-	3.8249	-	2.4854	0.1842	0.5834	0.036	0.2819	0.2075	10.4762	0.1423	0.0043	70.6023	49.0695	1.7141
Synchysite	Average	16.0883	4.55445	0.4477	0.269437	4.92705	13.452	1.96761	6.38736	2.10648	0.237075	3.426	0.208237	2.40937	0.55185	0.743938	0.301887	0.272462	0.361325	14.1219	1.43992	0.060025	74.3343	51.4745	1.35043
Mineral	Positon	P2O5	SiO2	FeO	La2O3	Ce2O3	Pr2O3	Nd2O3	Sm2O3	Eu2O3	Gd2O3	Tb2O3	Dy2O3	Ho2O3	Er2O3	Tm2O3	Yb2O3	Lu2O3	Y2O3	ThO2	UO2	F	Total	RE2O3	LREE/HREE
Monazite	025-7 Mnt-1	29.308	2.152	0.085	13.389	31.026	4.931	10.912	2.118	-	1.784	-	0.966	-	0.006	0.038	-	0.184	1.697	0.879	0.139	0.71	100.324	67.051	13.3425
Monazite	025-7 Mnt-2	25.851	4.934	0.021	14.072	30.816	4.675	9.987	1.18	-	0.45	-	0.096	-	-	-	-	-	0.275	8.507	0.103	0.597	101.564	61.551	73.9708
Monazite	025-7 Mnt-3	29.3	2.151	0.085	13.39	30.279	4.936	10.902	2.119	-	1.781	-	0.964	-	0.006	0.038	-	0.185	1.696	0.879	0.139	0.713	99.563	66.296	13.1961
Monazite	025-7 Mnt-4	25.842	4.931	0.021	14.074	30.075	4.679	9.978	1.181	-	0.449	-	0.096	-	-	-	-	-	0.275	8.511	0.103	0.599	100.814	60.807	73.1549
Monazite	025-7 Mnt-5	25.835	4.928	0.021	14.081	29.485	4.682	9.983	1.181	-	0.449	-	0.096	-	-	-	-	-	0.275	8.514	0.103	0.6	100.233	60.232	72.4537
Monazite	025-7 Mnt-6	25.829	4.925	0.021	14.087	28.961	4.684	9.987	1.182	-	0.45	-	0.096	-	-	-	-	-	0.275	8.516	0.103	0.602	99.718	59.722	71.743
Monazite	025-7 Mnt-7	25.709	5.042	0.026	14.423	31.347	4.524	7.724	0.9	-	0.33	-	0.075	0.113	-	0.032	-	0.006	0.163	9.817	0.082	0.635	100.948	59.637	81.9444
Monazite	025-7 Mnt-8	24.113	5.447	0.027	12.158	29.296	3.958	7.22	0.743	-	0.034	-	0.032	0.049	-	0.044	-	0.054	0.145	16.453	0.361	0.598	100.732	53.733	149.092
Monazite	025-7 Mnt-9	28.981	2.196	0.178	10.211	31.167	4.925	13.945	2.29	-	1.433	-	0.229	-	-	0.175	-	-	0.183	2.451	-	0.737	99.101	64.558	30.9594
Monazite	025-7 Mnt-10	29.27	2.134	0.004	11.774	29.351	5.015	13.651	2.077	-	1.62	-	0.321	0.041	-	0.034	-	0.177	1.794	2.233	-	0.624	100.12	65.855	15.5174
Monazite	025-7 Mnt-11	29.244	1.9	0.005	11.595	28.441	4.708	14.23	2.434	-	1.882	-	0.638	0.222	-	0.094	-	0.118	2.12	1.493	0.118	0.699	99.941	66.482	12.1025
Monazite	025-7 Mnt-12	29.83	1.939	-	11.229	28.278	4.698	14.558	2.855	-	2.179	-	0.671	-	-	0.091	-	0.21	2.189	1.494	-	0.6	100.821	66.958	11.539
Monazite	025-7 Mnt-13	29.856	1.919	0.038	11.267	27.731	4.949	13.995	2.763	-	2.168	-	0.595	0.114	0.083	0.098	-	0.15	1.66	1.656	-	0.504	99.546	65.573	12.4702
Monazite	025-7 Mnt-14	25.114	4.771	0.112	10.982	25.719	4.422	11.21	1.697	-	1.207	-	0.404	0.087	0.055	-	-	0.109	1.285	12.99	0.347	0.617	101.128	57.177	17.1687
Monazite	025-7 Mnt-15	30.259	1.826	0.041	10.148	26.345	4.462	10.76	2.74	-	3.319	-	1.855	0.209	0.076	0.133	-	0.285	3.04	0.581	0.244	0.552	96.875	63.372	6.10687
Monazite	025-7 Mnt-16	29.694	1.732	0.233	11.219	28.766	4.551	10.658	2.426	-	2.01	-	0.677	-	-	0.067	-	0.155	1.259	4.383	0.075	0.631	98.536	61.788	13.8244
Monazite	025-7 Mnt-17	28.307	3.166	0.214	13.94	31.215	4.637	9.506	1.293	-	0.848	-	0.107	0.037	0.013	-	-	0.061	0.363	5.459	0.077	0.763	100.006	62.02	42.401
Monazite	025-7 Mnt-18	29.916	2.112	0.042	11.155	27.596	4.736	13.31	2.791	-	3.565	-	1.734	0.102	-	0.172	-	0.235	1.965	0.281	0.037	0.696	100.445	67.361	7.66602
Monazite	025-7 Mnt-19	25.684	5.032	0.026	14.44	29.462	4.533	7.725	0.901	-	0.33	-	0.075	0.114	-	0.032	-	0.006	0.163	9.828	0.082	0.64	99.073	57.781	79.2514
Monazite	025-7 Mnt-20	24.084	5.435	0.027	12.172	27.533	3.966	7.221	0.744	-	0.034	-	0.032	0.049	-	0.044	-	0.054	0.145	16.467	0.362	0.603	98.972	51.994	144.235
Monazite	025-7 Mnt-21	29.25	2.131	0.004	11.785	27.583	5.024	13.651	2.08	-	1.619	-	0.32	0.041	-	0.034	-	0.178	1.793	2.236	-	0.628	98.357	64.108	15.0873
Monazite	025-7 Mnt-22	29.226	1.898	0.005	11.605	26.725	4.716	14.23	2.438	-	1.88	-	0.638	0.223	-	0.094	-	0.118	2.118	1.495	0.118	0.704	98.231	64.785	11.7756
Monazite	025-7 Mnt-23	29.813	1.936	-	11.238	26.572	4.706	14.557	2.859	-	2.177	-	0.67	-	-	0.091	-	0.211	2.187	1.496	-	0.604	99.117	65.268	11.2316
Monazite	025-7 Mnt-24	29.838	1.917	0.039	11.277	26.058	4.957	13.994	2.767	-	2.166	-	0.595	0.114	0.083	0.098	-	0.151	1.658	1.659	-	0.507	97.878	63.918	12.1383
Monazite	025-7 Mnt-25	25.092	4.763	0.112	10.992	24.167	4.43	11.208	1.699	-	1.206	-	0.403	0.088	0.055	-	-	0.11	1.284	13.002	0.347	0.621	99.579	55.642	16.6866
Monazite	025-7 Mnt-26	30.242	1.823	0.041	10.157	24.756	4.469	10.759	2.744	-	3.316	-	1.852	0.211	0.076	0.134	-	0.287	3.037	0.581	0.244	0.556	95.285	61.798	5.93347
Monazite	025-7 Mnt-27	29.838	1.917	0.039	11.277	26.058	4.957	13.994	2.767	-	2.166	-	0.595	0.114	0.083	0.098	-	0.151	1.658	1.659	-	0.507	97.878	63.918	12.1383
Monazite	025-7 Mnt-28	25.099	4.768	0.112	10.978	25.697	4.424	11.193	1.696	-	1.205	-	0.403	0.088	0.055	-	-	0.11	1.522	12.997	0.347	0.618	101.312	57.371	15.9586
Monazite	025-7 Mnt-29	29.902	2.109	0.042	11.165	25.93	4.744	13.309	2.795	-	3.562	-	1.732	0.103	-	0.173	-	0.237	1.964	0.282	0.037	0.701	98.787	65.714	7.45631
Monazite	025-7 Mnt-30	26.278	3.762	0.254	10.17	23.826	4.33	12.292	2.345	-	2.072	-	0.619	0.023	0.013	0.199	-	0.103	2.464	9.406	0.252	0.604	99.012	58.456	9.64191
Monazite	025-7 Mnt-31	25.228	4.862	0.249	12.072	26.391	4.486	10.444	1.541	-	0.988	-	0.223	0.055	-	0.031	-	0.057	0.784	12.849	0.196	0.593	101.049	57.072	25.6941
Monazite	095-1 Mnt-1	28.111	1.268	0.015	11.509	30.321	4.905	12.117	1.855	-	0.741	-	0.245	-	-	-	-	0.028	0.035	7.432	0.056	0.573	99.211	61.756	57.8713
Monazite	095-1 Mnt-2	28.949	1.028	0.023	12.07	29.328	4.863	9.895	1.431	-	0.843	-	0.167	0.14	-	0.036	-	-	0.244	9.324	0.173	0.83	99.344	59.017	40.2706
Monazite	Average	27.8452	3.11679	0.0655152	12.0031	28.0697	4.65703	11.488	1.95855	-	1.52312	-	0.552152	0.0708182	0.018303	0.0630303	-	0.11303	1.26409	5.93364	0.128636	0.629273	99.5	61.7809	35.8795
Mineral	Positon	P2O5	SiO2	FeO	Y2O3	La2O3	Ce2O3	Pr2O3	Nd2O3	Sm2O3	Eu2O3	Gd2O3	Tb2O3	Dy2O3	Ho2O3	Er2O3	Tm2O3	Yb2O3	Lu2O3	ThO2	UO2	F	Total	RE2O3	LREE/HREE
Xenotime	025-7 Xtm-1	33.873	1.805	0.874	40.756	0.023	0.13	-	0.617	1.054	-	5.628	-	5.596	0.759	2.984	0.535	4.442	1.316	0.036	0.154	0.39	100.972	63.84	0.0294118
Xenotime	025-7 Xtm-2	34.302	1.592	0.541	40.349	0.011	0.059	0.007	0.596	0.876	-	4.234	-	5.476	0.88	3.171	0.639	4.823	1.273	0.034	-	0.419	99.282	62.394	0.0254581
Xenotime	025-7 Xtm-3	31.143	3.012	0.179	42.677	-	0.074	0.007	0.475	0.849	-	4.743	-	5.67	0.941	2.367	0.502	3.898	1.218	0.394	0.407	0.284	98.84	63.421	0.0226554
Xenotime	025-7Xtm-4	33.87	1.805	0.873	40.749	0.023	0.121	-	0.616	1.053	-	5.619	-	5.582	0.762	2.98	0.536	4.441	1.323	0.036	0.154	0.391	100.934	63.805	0.0292457
Xenotime	025-7 Xtm-5	34.3	1.593	0.54	40.344	0.011	0.055	0.007	0.596	0.875	-	4.227	-	5.465	0.883	3.167	0.641	4.822	1.28	0.034	-	0.419	99.259	62.373	0.0253826
Xenotime	025-7 Xtm-6	34.137	1.82	0.875	40.117	0.023	0.13	-	0.617	1.055	-	5.63	-	6.595	0.764	2.986	0.537	4.452	1.326	0.036	0.154	0.39	101.644	64.232	0.0292435
Xenotime	025-7 Xtm-7	34.566	1.605	0.541	41.539	0.011	0.059	0.007	0.596	0.877	-	4.236	-	5.476	0.886	3.174	0.643	4.835	1.284	0.034	-	0.419	100.788	63.623	0.0249706
Xenotime	Average	33.7416	1.89029	0.631857	40.933	0.0145714	0.0897143	0.004	0.587571	0.948429	-	4.90243	-	5.69429	0.839286	2.97557	0.576143	4.53043	1.28857	0.0862857	0.124143	0.387429	100.246	63.384	0.026624
Mineral	Positon	Nb2O5	FeO	MnO	TiO2	La2O3	Ce2O3	Pr2O3	Nd2O3	Sm2O3	Eu2O3	Gd2O3	Tb2O3	Dy2O3	Ho2O3	Er2O3	Tm2O3	Yb2O3	Lu2O3	Y2O3	ThO2	UO2	Ta2O5	WO3	Total	RE2O3	LREE/HREE
Columbite	025-1 Clb-1	74.917	17.1745	4.1866	1.4104	-	0.0312	-	-	0.0003	-	-	-	-	-	-	-	0.054	0.0164	0.3069	-	0.1007	1.353	1.0311	100.582	0.4088	0.0834879
Columbite	025-1 Clb-2	72.2522	18.1985	3.7133	1.7711	-	0.0482	-	0.0387	0.0522	-	0.0207	-	0.108	0.0466	-	0.0383	0.1284	-	0.2334	0.0764	0.3075	2.4068	0.7544	100.195	0.7145	0.241745
Columbite	025-1 Clb-3	75.763	16.1994	3.8945	1.4316	-	0.089	-	-	0.0512	-	0.0356	-	0.1573	-	-	-	0.1132	0.127	0.3066	0.0902	0.0738	1.2201	0.7963	100.349	0.8799	0.189536
Columbite	Average	74.3107	17.1908	3.93147	1.5377	-	0.0561333	-	0.0129	0.0345667	-	0.0187667	-	0.0884333	0.0155333	-	0.0127667	0.0985333	0.0478	0.2823	0.0555333	0.160667	1.65997	0.8606	100.375	0.667733	0.183645
Mineral	Positon	Nb2O5	SiO2	FeO	TiO2	CaO	Y2O3	La2O3	Ce2O3	Pr2O3	Nd2O3	Sm2O3	Eu2O3	Gd2O3	Tb2O3	Dy2O3	Ho2O3	Er2O3	Tm2O3	Yb2O3	Lu2O3	ThO2	UO2	Ta2O5	WO3	Total	RE2O3	LREE/HREE
Samarskite	156-4 Smk-1	44.6052	2.448	0.8317	0.54	1.965	20.8437	0.0373	0.4179	0.0409	1.0602	0.8198	-	0.2273	0.3276	4.4057	1.8371	3.434	0.6481	3.718	0.6432	1.018	0.9913	1.2234	1.7005	93.7839	38.4608	0.0658479
Samarskite	156-4 Smk-2	42.6145	0.1356	0.2938	1.3532	0.8727	20.1917	-	2.1748	0.3264	3.4996	1.7818	-	1.2043	0.4436	3.6609	2.0472	2.5992	0.4801	2.1438	0.3868	6.4763	2.456	1.4211	0.3746	96.938	40.9402	0.234715
Samarskite	156-4 Smk-3	44.4393	1.0188	0.6147	0.2582	1.4555	24.0921	0.0858	0.3876	0.1172	0.5313	0.7004	-	0.1803	0.4739	4.5861	2.2564	3.8178	0.5928	2.9672	0.7324	0.25	0.773	1.7047	1.7866	93.8221	41.5213	0.0459029
Samarskite	Average	43.8863	1.2008	0.580067	0.717133	1.43107	21.7092	0.0410333	0.993433	0.1615	1.69703	1.10067	-	0.5373	0.415033	4.21757	2.0469	3.28367	0.573667	2.943	0.587467	2.58143	1.40677	1.44973	1.28723	94.848	40.3074	0.109977
Mineral	Positon	SiO2	ThO2	UO2	Al2O3	FeO	CaO	P2O5	La2O3	Ce2O3	Pr2O3	Nd2O3	Sm2O3	Eu2O3	Gd2O3	Tb2O3	Dy2O3	Ho2O3	Er2O3	Tm2O3	Yb2O3	Lu2O3	Y2O3	F	Nb2O5	Total	RE2O3	LREE/HREE
Thorite	025-1 Thr-6	13.2265	66.1896	3.3259	0.3359	0.8959	0.1989	1.036	-	0.061	-	0.0581	0.1173	-	0.1409	0.0619	0.32	0.1968	0.7044	0.0742	0.9016	0.229	4.3196	1.9359	2.1877	96.5171	7.1848	0.0340222
Thorite	119-1 Thr-4	13.898	68.014	6.0174	0.4822	0.3834	0.9767	0.7457	-	0.4052	-	0.1604	-	-	-	-	-	-	-	-	0.0797	-	2.2086	0.7773	0.0045	94.1531	2.8539	0.24717
Thorite	119-1 Thr-12	15.1169	62.0367	4.261	0.4334	0.5601	0.6693	0.8585	0.1597	0.4513	-	0.2307	-	-	-	-	-	-	-	-	0.8707	-	4.241	0.8494	0.5687	91.3074	5.9534	0.164661
Thorite	Average	14.0805	65.4134	4.53477	0.417167	0.613133	0.614967	0.880067	0.0532333	0.305833	-	0.149733	0.0391	-	0.0469667	0.0206333	0.106667	0.0656	0.2348	0.0247333	0.617333	0.0763333	3.58973	1.18753	0.9203	93.9925	5.3307	0.114556
Mineral	Positon	SiO2	FeO	CaO	P2O5	La2O3	Ce2O3	Pr2O3	Nd2O3	Sm2O3	Eu2O3	Gd2O3	Tb2O3	Dy2O3	Ho2O3	Er2O3	Tm2O3	Yb2O3	Lu2O3	Y2O3	ThO2	F	Cl	Total	RE2O3	LREE/HREE
Bastnäsite	064-1 Bsn-1	0.3255	0.2442	1.6891	-	8.9964	25.737	2.8092	13.7235	3.153	-	5.2295	-	4.142	-	-	-	-	-	6.6558	3.7051	6.4404	-	82.8507	70.4464	3.3954
Bastnäsite	064-1 Bsn-2	0.4814	0.0709	1.6487	-	11.3056	27.3602	2.9808	12.7076	2.8104	-	3.1855	-	2.381	-	-	-	-	-	3.2326	3.5612	6.7237	-	78.4496	65.9637	6.49664
Bastnäsite	119-1 Bsn-3	0.5353	0.8929	0.5623	-	9.2942	23.9328	2.1704	12.1513	3.5682	1.4609	4.7849	0.609	1.9763	2.0804	0.1929	0.8925	-	0.9883	2.9183	1.4593	3.8641	-	74.3343	67.0204	3.64047
Bastnäsite	Average	0.4474	0.402667	1.30003	-	9.8654	25.6767	2.65347	12.8608	3.1772	0.486967	4.39997	0.203	2.8331	0.693467	0.0643	0.2975	-	0.329433	4.2689	2.90853	5.67607	-	78.5449	67.8102	4.51084
Mineral	Positon	Si	Fe	Ca	La	Ce	Pr	Nd	Sm	Eu	Gd	Tb	Dy	Ho	Er	Tm	Yb	Lu	Y	Th	F	Total	REE	LREE/HREE
Fluocerite	025-7 Fcrt-1	0.403366	0.663814	0.370215	25.5891	31.8679	5.3661	6.83568	0.659706	0.0120906	0.1874	-	-	-	0.0209886	-	-	0.00527631	0.196861	0.78389	25.029	97.9915	70.7412	171.318
Fluocerite	025-7 Fcrt-2	0.119187	0.389427	0.318042	22.2219	33.7684	5.43104	6.95571	0.584681	-	0.111052	-	-	-	0.0463497	0.0105072	-	-	0.174025	0.984256	29.178	100.293	69.3037	201.681
Fluocerite	025-7 Fcrt-3	0.119187	0.389427	0.318042	22.2364	31.9943	5.43958	6.954	0.586405	-	0.111052	-	-	-	0.0463497	0.0105072	-	-	0.174025	0.985135	28.861	98.2254	67.5526	196.56
Fluocerite	025-7 Fcrt-4	0.119187	0.389427	0.318756	21.2541	32.8925	5.44727	6.96429	0.585543	-	0.111052	-	-	-	0.0463497	0.0105072	-	-	0.174025	0.986014	28.633	97.932	67.4856	196.364
Fluocerite	032-4 Fcrt-1	-	0.0349785	1.4001	16.6103	34.1603	5.61646	8.30347	0.914965	-	0.296717	-	0.0636064	-	0	-	-	-	0.270093	5.0944	25.735	98.5004	66.236	104.067
Fluocerite	119-1 Fcrt-1	0.1176	0.2053	0.3495	17.9385	39.1594	3.6881	8.9393	0.8935	0.7339	2.2909	-	-	-	-	0.3394	-	-	0.1273	0.6423	25.9832	101.408	74.1103	25.8749
Fluocerite	119-1 Fcrt-2	0.0462	0.2127	0.5297	20.5693	35.4318	2.6454	8.0417	0.9967	0.5599	2.2782	-	-	-	-	0.1688	-	-	0.1407	1.7986	27.2356	100.655	70.8325	26.3728
Fluocerite	064-1 Fcrt-1	0.1951	-	0.7772	18.5981	33.4471	2.8382	5.763	0.8665	0.7071	2.4447	-	-	-	-	-	-	0.6016	0.2093	5.3246	29.0149	100.787	65.4756	19.1117
Fluocerite	Average	0.159975	0.326439	0.547694	20.6272	34.0902	4.55902	7.34464	0.761	0.503248	0.978884		0.0636064		0.0320075	0.107944		0.303438	0.183291	2.0749	27.4587	99.4741	68.9672	117.669
‘-’ are below the detection limit.

## Sheet: S5
Supplementary Table 5 | Electron microprobe data (wt.%) for REE-bearing minerals in regolith
Mineral	Positon	Horizon	SiO2	ZrO2	FeO	P2O5	La2O3	Ce2O3	Pr2O3	Nd2O3	Sm2O3	Eu2O3	Gd2O3	Tb2O3	Dy2O3	Ho2O3	Er2O3	Tm2O3	Yb2O3	Lu2O3	Y2O3	ThO2	UO2	HfO2	Total	RE2O3	LREE/HREE
Zircon	046-H19 Zrn-4	Saprock	33.1196	61.8886	0.0287	0.4508	-	0.0099	0.0101	0.0222	-	-	-	0.0555	0.0669	0.0543	0.0835	-	0.27	0.0055	0.472	0.147	0.7033	2.1474	99.5353	1.0499	0.0418775
Zircon	062-H14 Zrn-7	Saprock	33.3319	62.1738	0.114	0.1932	0.1173	0.0247	-	-	0.0118	0.0135	-	-	0.0458	-	0.1123	0.08	0.2153	-	0.5073	0.166	0.7737	2.0141	99.8947	1.128	0.174144
Zircon	Average	Saprock	33.2257	62.0312	0.07135	0.322	0.05865	0.0173	0.00505	0.0111	0.0059	0.00675	-	0.02775	0.05635	0.02715	0.0979	0.04	0.24265	0.00275	0.48965	0.1565	0.7385	2.08075	99.715	1.08895	0.108011
Mineral	Positon	Horizon	P2O5	SiO2	CaO	La2O3	Ce2O3	Pr2O3	Nd2O3	Sm2O3	Eu2O3	Gd2O3	Tb2O3	Dy2O3	Ho2O3	Er2O3	Tm2O3	Yb2O3	Lu2O3	Y2O3	ThO2	UO2	Total	RE2O3	LREE/HREE
Monazite	062-H14 Mnz-3	Saprock	27.4818	1.7679	0.191	12.081	27.9042	3.3487	11.911	2.3369	0.0087	0.7794	0.0188	0.3014	0.1614	0.1313	0.3753	-	-	2.5432	7.6745	0.3818	99.3983	61.9013	13.3596
Monazite	062-H14 Mnz-4	Saprock	29.8868	0.641	1.9291	10.3783	25.1132	2.4598	10.8379	2.906	-	0.9017	0.2554	0.4399	0.0845	0.0132	0.2033	0.0997	0.2223	0.6	11.2735	0.3008	98.5464	54.5152	18.3316
Monazite	062-H14 Mnz-5	Saprock	29.0523	1.1299	0.3957	13.1455	29.9534	3.2328	11.5885	2.2474	0.1387	0.7469	0.1627	0.4345	0.0567	0.1663	0.1482	0.2033	0.1042	2.2664	4.8624	0.3154	100.351	64.5955	14.06
Monazite	062-H14 Mnz-6	Saprock	29.1626	0.94	0.7093	13.1858	29.5304	3.2964	11.8179	2.2991	0.1202	0.7371	0.2571	0.2564	-	0.1947	0.3023	0.043	-	2.57	4.0972	0.2429	99.7624	64.6104	13.8169
Monazite	062-H14 Mnz-7	Saprock	27.2724	2.1906	0.1464	11.6806	26.9198	3.0274	11.4197	2.2159	0.0696	0.8363	0.2687	0.3392	-	0.1684	0.363	-	0.0113	2.6485	9.8906	0.6531	100.121	59.9684	11.937
Monazite	062-H14 Mnz-8	Saprock	25.3865	3.7611	0.2055	10.441	23.8607	2.5299	10.9921	2.1051	0.1125	0.7946	0.1582	0.4521	-	0.1976	0.0467	-	0.0596	2.3415	15.3111	0.7672	99.523	54.0916	12.355
Monazite	Average	Saprock	28.0404	1.73842	0.596167	11.8187	27.2136	2.9825	11.4278	2.35173	0.07495	0.799333	0.186817	0.370583	0.0504333	0.14525	0.2398	0.0576667	0.0662333	2.1616	8.85155	0.443533	99.6171	59.9471	13.9767
Mineral	Positon	Horizon	P2O5	SiO2	CaO	La2O3	Ce2O3	Pr2O3	Nd2O3	Sm2O3	Eu2O3	Gd2O3	Tb2O3	Dy2O3	Ho2O3	Er2O3	Tm2O3	Yb2O3	Lu2O3	Y2O3	ThO2	UO2	Total	RE2O3	LREE/HREE
Xenotime	062-H14 Xtm-10	Saprock	33.177	0.0726	0.1293	0.0229	0.1093	0.1124	0.3134	0.964	-	3.0586	0.8552	7.1023	3.3049	5.4337	0.9878	6.0426	1.3807	36.3211	0.3727	0.4988	100.259	66.0089	0.0236017
Xenotime	Average	Saprock	33.177	0.0726	0.1293	0.0229	0.1093	0.1124	0.3134	0.964	-	3.0586	0.8552	7.1023	3.3049	5.4337	0.9878	6.0426	1.3807	36.3211	0.3727	0.4988	100.259	66.0089	0.0236017
Mineral	Positon	Horizon	Nb2O5	FeO	MnO	TiO2	La2O3	Ce2O3	Pr2O3	Nd2O3	Sm2O3	Eu2O3	Gd2O3	Tb2O3	Dy2O3	Ho2O3	Er2O3	Tm2O3	Yb2O3	Lu2O3	Y2O3	ThO2	UO2	Ta2O5	WO3	Total	RE2O3	LREE/HREE
Columbite	062-H14 Clb-6	Saprock	71.7838	17.7187	3.4636	3.0485	-	0.0929	-	-	0.0727	-	0.0649	-	0.1634	0.0388	-	-	0.0003	0.0903	0.2135	-	0.096	1.4249	1.7158	99.9881	0.7368	0.289916
Columbite	Average	Saprock	71.7838	17.7187	3.4636	3.0485	-	0.0929	-	-	0.0727	-	0.0649	-	0.1634	0.0388	-	-	0.0003	0.0903	0.2135	-	0.096	1.4249	1.7158	99.9881	0.7368	0.289916
Mineral	Positon	Horizon	SiO2	ThO2	UO2	FeO	CaO	P2O5	La2O3	Ce2O3	Pr2O3	Nd2O3	Sm2O3	Eu2O3	Gd2O3	Tb2O3	Dy2O3	Ho2O3	Er2O3	Tm2O3	Yb2O3	Lu2O3	Y2O3	F	Total	RE2O3	LREE/HREE
Thorite	062-H14 Thr-5	Saprock	10.6692	59.006	6.6381	0.5997	0.7703	3.3834	-	0.0043	0.1603	0.2563	0.2589	0.0204	0.1885	0.2546	0.8645	1.0295	0.9593	0.143	0.9083	0.3212	5.1497	2.7761	94.3616	10.5188	0.0713136
Thorite	062-H14 Thr-6	Saprock	11.8437	55.234	5.9837	0.3396	1.0004	4.1361	0.1383	-	-	0.244	0.2511	0.0873	-	0.0337	0.5575	0.6025	1.066	0.2141	1.1535	0.2916	7.062	2.8981	93.1372	11.7016	0.0656321
Thorite	046-H19 Thr-3	Saprock	14.5572	52.5667	9.027	0.5057	1.6468	2.572	-	0.0247	0.0533	0.0496	0.1428	0.043	-	0.0094	0.6402	0.7516	0.9394	0.1468	0.7575	0.4222	5.0351	0.4836	90.3746	9.0156	0.0360139
Thorite	Average	Saprock	12.3567	55.6022	7.21627	0.481667	1.13917	3.36383	0.0461	0.00966667	0.0712	0.1833	0.2176	0.0502333	0.0628333	0.0992333	0.6874	0.794533	0.988233	0.167967	0.939767	0.345	5.74893	2.0526	92.6245	10.412	0.0576532
Mineral	Positon	Horizon	SiO2	ZrO2	P2O5	La2O3	Ce2O3	Pr2O3	Nd2O3	Sm2O3	Eu2O3	Gd2O3	Tb2O3	Dy2O3	Ho2O3	Er2O3	Tm2O3	Yb2O3	Lu2O3	Y2O3	ThO2	UO2	HfO2	Total	RE2O3	LREE/HREE
Zircon	025-H17 Zrn-5	Saprolite	32.6124	59.5377	0.8364	0.0415	0.0536	0.0013	-	0.0167	-	0.2399	0.0203	-	0.0553	0.1585	-	0.2584	-	1.0627	0.2993	1.0647	2.0286	98.2873	1.9082	0.0630048
Zircon	025-H17 Zrn-6	Saprolite	32.4821	59.9582	0.2349	-	0.0234	-	-	-	0.0009	0.184	-	0.1082	0.033	0.3216	-	0.5423	-	1.2654	0.8696	1.1974	1.1633	98.3843	2.4788	0.00990018
Zircon	Average	Saprolite	32.5472	59.748	0.53565	0.02075	0.0385	0.00065	-	0.00835	0.00045	0.21195	0.01015	0.0541	0.04415	0.24005	-	0.40035	-	1.16405	0.58445	1.13105	1.59595	98.3358	2.1935	0.0364525
Mineral	Positon	Horizon	TiO2	SiO2	Al2O3	FeO	La2O3	Ce2O3	Pr2O3	Nd2O3	Sm2O3	Eu2O3	Gd2O3	Tb2O3	Dy2O3	Ho2O3	Er2O3	Tm2O3	Yb2O3	Lu2O3	Y2O3	Nb2O5	Total	RE2O3	LREE/HREE
Rutile	025-H17 Rt-1	Saprolite	94.2076	0.0809	0.3042	2.3661	-	0.4237	-	0.0205	-	0.0769	-	0.0481	0.0438	-	-	-	0.0577	-	0.035	1.4674	99.1319	0.7057	2.82286
Rutile	025-H17 Rt-2	Saprolite	93.1475	0.1539	0.8513	2.235	-	0.3209	-	0.044	0.0044	-	-	0.0691	-	0.0148	-	-	0.0672	-	0.0117	1.6508	98.5706	0.5321	2.26843
Rutile	025-H17 Rt-3	Saprolite	92.6211	0.415	1.5128	2.0355	-	0.4279	-	0.0158	0.0394	0.0523	0.0936	0.0429	0.0313	-	0.0266	0.0047	-	-	0.0332	1.6798	99.0319	0.7677	2.30478
Rutile	Average	Saprolite	93.3254	0.2166	0.889433	2.2122	-	0.390833	-	0.0267667	0.0146	0.0430667	0.0312	0.0533667	0.0250333	0.00493333	0.00886667	0.00156667	0.0416333	-	0.0266333	1.59933	98.9115	0.6685	2.46536
Mineral	Positon	Horizon	P2O5	SiO2	CaO	La2O3	Ce2O3	Pr2O3	Nd2O3	Sm2O3	Eu2O3	Gd2O3	Tb2O3	Dy2O3	Ho2O3	Er2O3	Tm2O3	Yb2O3	Lu2O3	Y2O3	ThO2	UO2	Total	RE2O3	LREE/HREE
Monazite	025-H12 Mnz-9	Saprolite	24.2746	3.5865	0.0789	10.0391	24.4351	3.3049	12.0194	2.2902	0.1664	0.7542	-	0.2488	-	0.2738	0.2435	-	0.0359	1.6646	16.2398	0.5416	100.197	55.4759	16.2243
Monazite	025-H12 Mnz-10	Saprolite	29.2965	0.7214	0.1573	12.9863	30.0529	3.398	13.6456	2.7186	0.0886	0.8624	0.1341	0.3102	-	0.0912	0.3844	-	0.1517	1.6525	3.3593	-	100.011	66.4765	17.5352
Monazite	Average	Saprolite	26.7856	2.15395	0.1181	11.5127	27.244	3.35145	12.8325	2.5044	0.1275	0.8083	0.06705	0.2795	-	0.1825	0.31395	-	0.0938	1.65855	9.79955	0.2708	100.104	60.9762	16.8797
Mineral	Positon	Horizon	P2O5	SiO2	CaO	La2O3	Ce2O3	Pr2O3	Nd2O3	Sm2O3	Eu2O3	Gd2O3	Tb2O3	Dy2O3	Ho2O3	Er2O3	Tm2O3	Yb2O3	Lu2O3	Y2O3	ThO2	UO2	Total	RE2O3	LREE/HREE
Xenotime	025-H12 Xtm-10	Saprolite	33.4464	0.7251	0.0009	0.1967	0.4312	-	0.6373	0.6754	-	2.097	0.5583	4.5398	2.3207	4.0846	0.6341	3.6077	0.6974	43.0606	0.6023	0.768	99.0835	63.5408	0.0315031
Xenotime	025-H17 Xtm-8	Saprolite	29.5817	4.1043	0.044	0.0261	0.1451	0.0757	0.0367	0.1231	0.0539	0.6013	0.1709	1.9864	0.7563	2.2767	0.4579	3.5797	0.6216	51.2114	0.6276	0.1819	96.6623	62.1228	0.00746973
Xenotime	025-H17 Xtm-9	Saprolite	33.1358	0.6547	0.183	-	-	0.1366	0.1458	0.0631	0.0349	0.5951	0.3526	5.0088	1.6589	5.5868	0.8582	5.9647	1.0053	43.7201	0.7929	0.1372	100.034	65.1309	0.00587486
Xenotime	Average	Saprolite	32.0546	1.82803	0.0759667	0.0742667	0.1921	0.0707667	0.273267	0.2872	0.0296	1.0978	0.3606	3.845	1.57863	3.9827	0.650067	4.38403	0.774767	45.9974	0.674267	0.362367	98.5934	63.5982	0.0149492
Mineral	Positon	Horizon	Nb2O5	FeO	MnO	TiO2	La2O3	Ce2O3	Pr2O3	Nd2O3	Sm2O3	Eu2O3	Gd2O3	Tb2O3	Dy2O3	Ho2O3	Er2O3	Tm2O3	Yb2O3	Lu2O3	Y2O3	Ta2O5	WO3	Total	RE2O3	LREE/HREE
Columbite	025-H17 Clb-2	Saprolite	70.1057	17.877	2.7598	1.7991	-	0.063	-	0.0075	0.0139	-	0.1519	-	-	0.0087	-	0.0721	0.032	-	0.1588	5.6393	1.5614	100.25	0.5079	0.199292
Columbite	025-H17 Clb-3	Saprolite	60.4858	16.7485	2.8725	1.1354	-	0.1001	-	-	0.0803	-	0.1031	-	-	-	-	0.1343	-	-	0.0201	17.1082	1.8266	100.616	0.4392	0.705631
Columbite	025-H17 Clb-4	Saprolite	72.9284	17.6433	3.3754	2.4437	-	0.0115	0.1004	-	-	-	-	-	-	0.052	-	-	0.1388	-	0.1675	1.861	1.4416	100.164	0.4702	0.312308
Columbite	025-H17 Clb-5	Saprolite	74.0712	17.9551	2.9868	1.6867	-	0.0544	0.0061	-	0.0543	-	-	0.0147	0.1207	-	0.052	-	-	-	0.2047	2.2336	1.1612	100.602	0.5069	0.292782
Columbite	046-H19 Clb-1	Saprolite	61.726	24.283	5.1371	1.3465	-	0.0643	0.2285	0.0846	-	-	0.0593	-	0.0419	-	-	-	0.019	-	0.2007	2.6646	1.4795	97.335	0.6983	1.17607
Columbite	Average	Saprolite	67.8634	18.9014	3.42632	1.68228	-	0.05866	0.067	0.01842	0.0297	-	0.06286	0.00294	0.03252	0.01214	0.0104	0.04128	0.03796	-	0.15036	5.90134	1.49406	99.7933	0.5245	0.537216
Mineral	Positon	Horizon	Nb2O5	SiO2	Al2O3	FeO	MnO	TiO2	CaO	La2O3	Ce2O3	Pr2O3	Nd2O3	Sm2O3	Eu2O3	Gd2O3	Tb2O3	Dy2O3	Ho2O3	Er2O3	Tm2O3	Yb2O3	Lu2O3	Y2O3	ThO2	UO2	Ta2O5	ZrO2	PbO	WO3	Total	RE2O3	LREE/HREE
Samarskite	025-H17 Smk-1	Saprolite	50.5936	3.9058	0.2423	2.9525	0.1389	0.8295	1.2858	0.0281	0.7173	0.111	0.3796	0.2261	-	0.1382	0.2489	1.6449	0.5504	1.3327	0.311	1.3748	0.1094	3.726	9.9009	1.3782	0.6498	0.8773	11.0917	1.1826	95.9273	10.8984	0.154944
Samarskite	095-1-H11 Smk-1	Saprolite	19.9983	4.4821	0.9437	6.0562	0.6916	21.3705	0.8519	-	1.4003	0.1254	0.7875	0.6103	-	0.2647	0.1379	2.8504	1.2797	1.3322	0.3597	0.9401	0.1255	4.8987	16.2469	2.0086	1.7895	1.5733	2.3863	0.6778	94.1891	15.1124	0.239849
Samarskite	095-1-H11 Smk-2	Saprolite	22.8371	3.5693	0.9436	9.3674	0.883	26.0673	0.6694	-	0.3711	0.0601	0.304	0.0947	-	0.0197	0.0535	1.4479	0.5259	0.5302	0.1638	0.3173	-	2.3106	6.4349	3.2105	8.6373	1.3144	3.5133	0.9968	94.6431	6.1988	0.154575
Samarskite	095-1-H11 Smk-3	Saprolite	29.086	3.3317	0.7482	9.9907	1.7399	15.8201	0.6041	-	0.6183	0.1558	0.3777	0.2782	-	0.276	0.0231	2.2475	0.3597	0.8804	0.2561	0.5243	0.086	2.4472	6.4113	3.312	8.4341	1.3264	2.4619	1.8946	93.6913	8.5303	0.2014
Samarskite	095-1-H11 Smk-4	Saprolite	18.9294	4.3101	0.9714	5.8056	0.3429	26.095	0.87	-	1.0957	-	0.6569	0.5864	-	0.4546	0.1368	2.2951	0.8594	1.2302	0.3297	0.7196	0.3287	4.3969	15.7434	2.1163	1.7505	1.6856	2.2352	0.6261	94.5715	13.09	0.217561
Samarskite	Average	Saprolite	28.2889	3.9198	0.76984	6.83448	0.75926	18.0365	0.85624	0.00562	0.84054	0.09046	0.50114	0.35914	-	0.23064	0.12004	2.09716	0.71502	1.06114	0.28406	0.77522	0.12992	3.55588	10.9475	2.40512	4.25224	1.3554	4.33768	1.07558	94.6045	10.766	0.193666
Mineral	Positon	Horizon	SiO2	ThO2	UO2	Al2O3	FeO	CaO	P2O5	La2O3	Ce2O3	Pr2O3	Nd2O3	Sm2O3	Eu2O3	Gd2O3	Tb2O3	Dy2O3	Ho2O3	Er2O3	Tm2O3	Yb2O3	Lu2O3	Y2O3	F	Nb2O5	Total	RE2O3	LREE/HREE
Thorite	025-H17 Thr-4	Saprolite	12.6995	71.0089	5.7475	0.2908	0.2383	0.8231	1.6275	-	0.2319	-	0.1932	0.0827	-	0.2799	0.1974	0.3207	0.164	0.2081	0.0301	0.1145	0.0661	1.9749	0.2743	0.4731	97.0465	3.8635	0.151325
Thorite	Average	Saprolite	12.6995	71.0089	5.7475	0.2908	0.2383	0.8231	1.6275	-	0.2319	-	0.1932	0.0827	-	0.2799	0.1974	0.3207	0.164	0.2081	0.0301	0.1145	0.0661	1.9749	0.2743	0.4731	97.0465	3.8635	0.151325
Mineral	Sample No.	Horizon	SiO2	ZrO2	P2O5	La2O3	Ce2O3	Pr2O3	Nd2O3	Sm2O3	Eu2O3	Gd2O3	Tb2O3	Dy2O3	Ho2O3	Er2O3	Tm2O3	Yb2O3	Lu2O3	Y2O3	ThO2	UO2	HfO2	Total	RE2O3	LREE/HREE
Zircon	062-H2 Zrn-8	Pedolith	32.6896	59.1311	0.4342	-	0.0178	-	-	0.0433	-	0.2167	-	0.0656	0.0304	0.2261	0.0503	0.6818	0.1239	0.5275	0.0229	1.2101	4.0964	99.5677	1.9834	0.0317848
Zircon	062-H2 Zrn-9	Pedolith	33.1397	62.1986	0.1611	0.095	0.2207	0.0203	-	-	-	0.174	-	0.0609	0.0641	0.0281	-	0.2473	0.0302	0.496	0.1605	0.6248	2.2339	99.9552	1.4366	0.305288
Zircon	Average	Pedolith	32.9147	60.6649	0.29765	0.0475	0.11925	0.01015	-	0.02165	-	0.19535	-	0.06325	0.04725	0.1271	0.02515	0.46455	0.07705	0.51175	0.0917	0.91745	3.16515	99.7614	1.71	0.168536
Mineral	Sample No.	Horizon	P2O5	SiO2	FeO	CaO	La2O3	Ce2O3	Pr2O3	Nd2O3	Sm2O3	Eu2O3	Gd2O3	Tb2O3	Dy2O3	Ho2O3	Er2O3	Tm2O3	Yb2O3	Lu2O3	Y2O3	ThO2	UO2	Total	RE2O3	LREE/HREE
Monazite	062-H2 Mnz-9	Pedolith	28.5628	0.9789	0.0905	0.329	14.4954	31.3068	3.3872	11.3104	1.9989	0.1595	0.4796	0.0758	0.1773	-	0.1055	0.1299	-	-	0.3149	5.2395	-	99.1419	63.9412	48.8373
Monazite	062-H2 Mnz-10	Pedolith	27.5108	1.3248	0.1229	0.2158	13.4033	29.9143	3.0611	11.5084	2.0916	0.1094	0.8486	0.0238	0.2911	-	0.2095	0.2728	-	0.1976	1.5383	6.2545	0.1359	99.0345	63.4698	17.7686
Monazite	Average	Pedolith	28.0368	1.15185	0.1067	0.2724	13.9494	30.6105	3.22415	11.4094	2.04525	0.13445	0.6641	0.0498	0.2342	-	0.1575	0.20135	-	0.0988	0.9266	5.747	0.06795	99.0882	63.7055	33.3029
Mineral	Sample No.	Horizon	P2O5	SiO2	FeO	CaO	Y2O3	La2O3	Ce2O3	Pr2O3	Nd2O3	Sm2O3	Eu2O3	Gd2O3	Tb2O3	Dy2O3	Ho2O3	Er2O3	Tm2O3	Yb2O3	Lu2O3	ThO2	UO2	Total	RE2O3	LREE/HREE
Xenotime	062-H2 Xtm-11	Pedolith	27.5256	2.0966	0.9073	0.3707	31.663	0.043	0.0734	0.0515	0.1147	0.66	0.0931	2.8995	0.865	7.8434	3.0501	5.1392	0.8809	4.4783	1.1512	3.6468	0.5475	94.1008	59.0063	0.017866
Xenotime	062-H2 Xtm-12	Pedolith	31.4692	0.3188	0.1618	0.0383	32.2095	0.0392	0.2056	0.079	0.3433	0.7309	-	3.2056	1.0178	8.77	3.7795	6.3701	0.7844	5.3255	1.3835	0.9106	0.7344	97.877	64.2439	0.0222449
Xenotime	Average	Pedolith	29.4974	1.2077	0.53455	0.2045	31.9363	0.0411	0.1395	0.06525	0.229	0.69545	0.04655	3.05255	0.9414	8.3067	3.4148	5.75465	0.83265	4.9019	1.26735	2.2787	0.64095	95.9889	61.6251	0.0200554
Mineral	Sample No.	Horizon	Nb2O5	FeO	MnO	TiO2	La2O3	Ce2O3	Pr2O3	Nd2O3	Sm2O3	Eu2O3	Gd2O3	Tb2O3	Dy2O3	Ho2O3	Er2O3	Tm2O3	Yb2O3	Lu2O3	Y2O3	Ta2O5	WO3	Total	RE2O3	LREE/HREE
Columbite	062-H2 Clb-7	Pedolith	53.4404	25.6486	2.158	6.1834	-	-	-	-	-	-	0.1297	-	-	-	-	-	-	0.1748	0.0272	5.3486	1.572	94.6827	0.3317	0
Columbite	062-H2 Clb-8	Pedolith	70.9187	17.325	3.1817	3.034	-	0.0213	0.1073	-	-	-	-	-	0.1232	0.0381	0.0165	0.0367	0.3637	-	0.3421	2.1312	1.8329	99.4724	1.0489	0.139737
Columbite	Average	Pedolith	62.1795	21.4868	2.66985	4.6087	-	0.01065	0.05365	-	-	-	0.06485	-	0.0616	0.01905	0.00825	0.01835	0.18185	0.0874	0.18465	3.7399	1.70245	97.0776	0.6903	0.0698685
Mineral	Sample No.	Horizon	SiO2	ThO2	UO2	Al2O3	FeO	CaO	P2O5	La2O3	Ce2O3	Pr2O3	Nd2O3	Sm2O3	Eu2O3	Gd2O3	Tb2O3	Dy2O3	Ho2O3	Er2O3	Tm2O3	Yb2O3	Lu2O3	Y2O3	F	Nb2O5	Total	RE2O3	LREE/HREE
Thorite	062-H2 Thr-6	Pedolith	11.2903	65.0712	6.4003	0.3357	0.1588	0.213	1.9164	-	-	0.0867	0.3076	0.0284	-	0.2505	0.1465	0.1921	0.1862	0.5083	0.1287	0.3586	0.255	2.1769	0.1707	0.2347	90.4166	4.6255	0.100576
Thorite	062-H2 Thr-7	Pedolith	10.7875	61.93	5.6532	0.27	0.1346	0.2876	2.2189	0.0206	0.173	0.1206	0.1463	0.0379	-	0.2948	0.0721	0.2218	0.1908	0.4709	-	0.5961	-	2.6169	0.342	0.4104	86.996	4.9618	0.111664
Thorite	Average	Pedolith	11.0389	63.5006	6.02675	0.30285	0.1467	0.2503	2.06765	0.0103	0.0865	0.10365	0.22695	0.03315	-	0.27265	0.1093	0.20695	0.1885	0.4896	0.06435	0.47735	0.1275	2.3969	0.25635	0.32255	88.7063	4.79365	0.10612
‘-’ are below the detection limit.

## Sheet: S6
Supplementary Table 6 | Mass balance calculations of fluorite
No.	Fluorite-I (mass %)	Fluorite-II (mass %)	Synchysite (mass %)	ω Fluorite-I (ppm)	ω Fluorite-II (ppm)	ω Synchysite (ppm)	ω Pre-Fluorite-II (ppm)
a	5.71	5.05	0.67	265796	56798.8	289383	235074
b	5.63	2.32	0.02	262072	26093.7	8638.3	107994
c	2.54	2.22	0.17	118235	24969	73425.6	103339
d	3.11	2.22	0.38	144768	24969	164128	103339
e	17.42	12.44	1.28	810888	139916	552851	579072
f	7.84	4.53	0.25	364946	50950.2	107979	210868
g	18.16	8.2	0.32	845334	92227.7	138213	381704
h	2.78	2.62	0.25	129407	29467.9	107979	121959
i	6.2	4.13	0.13	288605	46451.3	56149	192248
j	12.05	5.15	0.12	560918	57923.5	51829.8	239729
k	4.75	4.15	0.17	221109	46676.2	73425.6	193179
l	5.34	4.52	0.22	248573	50837.7	95021.3	210403
m	10.36	7.07	0.53	482250	79518.3	228915	329103
n	5.64	3.32	0.3	262538	37341	129575	154543
o	7.41	5.62	0.58	344930	63209.7	250511	261607
p	8.04	4.77	0.35	374256	53649.5	151170	222040
q	7.44	6.23	0.6	346326	70070.5	259149	290002
r	16.7	6.77	0.58	777372	76144.1	250511	315138
s	13.16	8.45	0.58	612588	95039.5	250511	393341
t	4.83	2.27	0.32	224833	25531.3	138213	105667
Average	8.2555	5.1025	0.391	384287	57389.2	168879	237517

## Sheet: S7
Supplementary Table 7 | Contribution of REE-bearing minerals in bedrock
	ωREE (ppm)	REE Contribution (%)	ωLREE (ppm)	LREE Contribution (%)	ωHREE (ppm)	HREE Contribution (%)
Fluorite-Ⅰ	140.049	28.1788	32.5316	14.4318	107.517	39.5887
Fluorite-Ⅱ	59.8314	12.0385	17.4552	7.74359	42.3762	15.6033
Synchysite	173.595	34.9285	101.537	45.0444	72.0579	26.5324
Zircon	5.67478	1.14181	0.476054	0.21119	5.19873	1.91422
Monazite	35.9822	7.23988	35.0184	15.5351	0.963764	0.354867
Columbite	0.34756	0.0699315	0.052135	0.0231284	0.295425	0.108778
Thorite	1.915	0.385311	0.263234	0.116778	1.65176	0.608194
Samarskite	13.3224	2.68057	1.43319	0.635798	11.8892	4.37772
Xenotime	19.4197	3.90739	0.52979	0.235028	18.8899	6.95544
Others	46.8635	9.42928	36.1187	16.0232	10.7448	3.95634
Total	497	100	225.415	100	271.585	100
"Others" refer to REE-bearing minerals such as apatite and titanite.

## Sheet: S8
Supplementary Table 8 | Fs-La data (ppm) for fluorite in bedrock
Mineral	Sample No.	Ca	La	Ce	Pr	Nd	Sm	Eu	Gd	Tb	Dy	Ho	Er	Tm	Yb	Lu	Y	Tb/Ca	Tb/La
Fluorite-Ⅰ	30-1 P3	221125	872.877	1962.3	261.282	1108.35	374.249	0.243011	416.55	79.9353	586.019	119.616	394.62	66.7388	518.953	77.0659	4666.5	0.000361494	0.0915768
	30-1 P7	356373	2430.26	6607.29	859.307	3380.27	1068.14	6.38938	1094.36	217.705	1465.69	349.531	994.137	163.074	1105.7	149.811	9052.58	0.000610891	0.0895809
	108-2 P4	332445	919.084	2738.75	434.425	2491.68	1236.63	13.4343	1781.5	380.19	2718.78	591.17	1896.01	327.276	2269.65	340.576	22587.5	0.00114362	0.413662
	108-2 P5	344980	1104.13	3523.05	542.037	4572.9	1351.34	14.1126	1742.3	363.281	2652.99	584.245	1918.28	327.876	2342.34	339.258	20234.6	0.00105305	0.329019
	108-2 P6	336604	1791.46	4908.89	661.232	3078.02	1128.73	5.62883	1285.66	262.948	1800.52	415.143	1326.02	226.53	1765.96	245.687	14771.9	0.00078118	0.146779
	169-1 P1	471974	1749.44	3308.72	397.986	1785.1	506.089	0.537717	551.096	103.234	726.998	157.767	500.362	77.4477	547.24	78.9304	9550.93	0.000218729	0.0590099
	169-1 P2	302305	477.49	1031.19	142.687	657.863	186.562	0.442065	233.505	41.2997	285.13	64.1137	178.666	25.9266	174.642	21.8384	2760.52	0.000136616	0.0864934
	169-1 P3	251588	896.248	1779.97	212.755	946.102	258.624	0.197775	294.353	53.4011	410.707	89.279	279.767	47.7983	343.265	48.2836	4467.55	0.000212256	0.0595829
	169-1 P4	252288	1234.45	2366.8	283.376	1260.7	356.751	0.236898	413.142	79.7593	585.597	134.198	419.266	70.0408	491.068	69.6192	7968.15	0.000316144	0.0646112
	169-1 P5	389921	1649.89	3288.55	386.815	1655.82	480.823	0.32644	540.943	107.453	724.456	159.347	518.329	84.1201	589.157	83.3663	9042.49	0.000275577	0.0651274
Fluorite-Ⅱ	30-1 P2	303492	53.5614	127.831	21.136	104.099	39.7067	0.127825	67.241	11.1605	78.6581	18.2956	51.8359	7.41691	46.4719	6.96883	1524.8	3.67736e-05	0.208368
	30-1 P4	424480	49.3385	115.681	7.3303	77.6715	26.4049	0.181548	41.6212	7.4884	51.6277	12.327	35.4405	5.4015	33.0554	4.68818	959.17	1.76413e-05	0.151776
	30-1 P5	201835	23.3929	62.6802	8.27351	37.6558	14.8182	0.0775416	17.3889	3.78859	32.4593	4.99898	17.1904	1.80218	11.996	1.64176	321.562	1.87708e-05	0.161955
	30-1 P6	306666	34.9848	80.1229	11.3185	56.8543	19.6641	0.10483	28.7125	5.16998	37.189	9.18219	27.1664	4.19856	23.3904	3.0778	611.515	1.68587e-05	0.147778
	108-2 P1	484217	618.396	1365.52	200.259	878.902	322.681	0.53529	330.431	70.3218	555.446	131.587	513.267	104.606	888.273	138.694	9872.73	0.000145228	0.113716
	108-2 P2	301719	470.729	635.499	148.856	615.337	193.386	0.570826	188.256	36.2425	287.004	82.2772	331.468	73.1132	535.336	88.5877	7686.46	0.00012012	0.0769923
	115-2 P4	442080	355.79	878.053	114.024	469.785	145.735	1.35628	147.581	21.9763	119.124	27.4378	107.612	27.8163	268.061	51.2144	2928.4	4.97112e-05	0.0617678
	115-2 P5	271793	45.9338	102.903	14.1211	66.3629	24.3495	0.223961	31.2929	6.14439	45.8748	10.1686	36.7291	6.86991	57.033	8.80564	722.903	2.26069e-05	0.133766
	115-2 P8	395981	289.88	551.058	67.9985	256.866	78.8085	0.410141	75.1757	15.0228	102.295	30.3232	134.733	35.1728	336.649	64.8705	3503.89	3.79383e-05	0.0518244
